# Supplementary material for: Two glaciers and one sedimentary sink: the competing role of the Aare and the Valais glaciers in filling an overdeepened trough inferred from provenance analysis
Source: Copernicus journal article supplement (doi:10.5194/egqsj-71-163-2022), 2022-09-01
Supplement: Supplementary file 1 [file egqsj-71-163-2022-supplement.zip]

Archive with 6 entries (5 files):
- Supplement/
- Supplement/Supplementary_PetroChemistry.xlsx
- Supplement/Supplementary_HM_garnet.xlsx
- Supplement/Supplementary_Stutenbeckeretal2018.xlsx
- Supplement/Supplementary_ProvenanceAnalysis.R
- egqsj-71-163-2022-supplement-title-page.pdf
