# Supplementary material for: Two glaciers and one sedimentary sink: the competing role of the Aare and the Valais glaciers in filling an overdeepened trough inferred from provenance analysis
Source: Copernicus journal article supplement (doi:10.5194/egqsj-71-163-2022), 2022-09-01
Supplement: Supplementary file 1 [file egqsj-71-163-2022-supplement.zip › egqsj-71-163-2022-supplement-title-page.pdf]

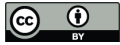

*Supplement of*

**Two glaciers and one sedimentary sink: the competing role of the Aare and the Valais glaciers in filling an overdeepened trough inferred from provenance analysis**

**Michael A. Schwenk et al.**

*Correspondence to:* Michael A. Schwenk ([michael.schwenk@geo.unibe.ch](mailto:michael.schwenk@geo.unibe.ch), [michi\\_schwenk@web.de](mailto:michi_schwenk@web.de))

- [egqsj-71-163-2022-supplement-title-page.pdf](#)
- Supplement
  - [Supplementary\\_HM\\_garnet.xlsx](#)
  - [Supplementary\\_PetroChemistry.xlsx](#)
  - [Supplementary\\_ProvenanceAnalysis.R](#)
  - [Supplementary\\_Stutenbeckeretal2018.xlsx](#)

The copyright of individual parts of the supplement might differ from the article licence.
