# Supplementary material for: Two glaciers and one sedimentary sink: the competing role of the Aare and the Valais glaciers in filling an overdeepened trough inferred from provenance analysis
Source: Copernicus journal article supplement (doi:10.5194/egqsj-71-163-2022), 2022-09-01
Supplement: Supplementary file 1 [file egqsj-71-163-2022-supplement.zip › Supplement/Supplementary_HM_garnet.xlsx]

## Sheet: HM data
Sample	Total count	sum transparent HM	Epidote	Garnet	Hornblende	Glaucophane	Zircon	Tourmaline	Rutile	Titanite	Staurolite	Apatite	Chloritoid	Silimanite	Opaques	Dolomite	Glauconite	Chlorite	Mica	other spurious
Rehhag, V024	400	249	150	41	28	1	5	1	1	6	5	10	1	0	70	48	2	16	6	9
Rehhag, V092	435	204	137	15	14	1	4	2	0	8	10	13	0	0	71	24	0	39	11	86
Rehhag, V203	446	201	125	44	7	0	3	4	2	7	2	5	1	1	107	38	0	30	4	66

## Sheet: Garnet data
sample	grain_no	SiO2	TiO2	Al2O3	Cr2O3	FeOtotal	MnO	MgO	CaO	used model	setting (class)	facies (class)	composition (class)	combined classification
AareBern	Grain1	37.6502	NA	19.8642	NA	31.5907	2.76022	1.06956	7.06506	Cr2O3_TiO2_excluded	MM	BS/GS	M	MMBS/GSM
AareBern	Grain10	37.6127	NA	19.5926	NA	36.067	2.03857	2.1533	2.53582	Cr2O3_TiO2_excluded	MM	AM	IF/S	MMAMIF/S
AareBern	Grain11	39.6039	NA	20.3698	NA	31.8905	1.10787	5.2272	1.80077	Cr2O3_TiO2_excluded	MM	GR	IF/S	MMGRIF/S
AareBern	Grain12	38.5811	NA	21.8402	NA	28.0852	2.01433	2.43108	7.048	Cr2O3_TiO2_excluded	MM	BS/GS	IF/S	MMBS/GSIF/S
AareBern	Grain13	37.0042	NA	21.2232	NA	26.5595	7.64164	2.26007	5.3114	Cr2O3_TiO2_excluded	MM	AM	IF/S	MMAMIF/S
AareBern	Grain14	39.1825	NA	21.1753	NA	32.011	1.40781	2.21445	4.00898	Cr2O3_TiO2_excluded	IG	NA	IF/S	IGNAIF/S
AareBern	Grain15	40.1729	NA	19.5724	NA	23.3302	7.12057	0.63731	9.16669	Cr2O3_TiO2_excluded	MM	BS/GS	IF/S	MMBS/GSIF/S
AareBern	Grain16	44.7251	NA	17.3107	NA	19.7675	1.26476	1.68991	15.242	Cr2O3_TiO2_excluded	MM	EC/UHP	IF/S	MMEC/UHPIF/S
AareBern	Grain17	38.3131	NA	20.6776	NA	34.2139	1.61059	2.03822	3.1466	Cr2O3_TiO2_excluded	MM	AM	IF/S	MMAMIF/S
AareBern	Grain18	37.5534	NA	21.666	NA	33.7954	1.63028	3.39056	1.96437	Cr2O3_TiO2_excluded	MM	AM	IF/S	MMAMIF/S
AareBern	Grain19	38.0858	NA	21.2939	NA	21.863	17.7076	0.405258	0.644437	Cr2O3_TiO2_excluded	IG	NA	IF/S	IGNAIF/S
AareBern	Grain2	38.1016	NA	19.4087	NA	28.752	4.34279	1.36031	8.03454	Cr2O3_TiO2_excluded	MM	AM	IF/S	MMAMIF/S
AareBern	Grain20	36.9913	NA	20.9012	NA	33.801	2.63662	4.16273	1.50719	Cr2O3_TiO2_excluded	IG	NA	IF/S	IGNAIF/S
AareBern	Grain21	38.8971	NA	21.8549	NA	31.1958	1.78746	2.98885	3.27589	Cr2O3_TiO2_excluded	MM	AM	IF/S	MMAMIF/S
AareBern	Grain22	38.1865	NA	19.6649	NA	29.6583	4.74653	2.63803	5.10573	Cr2O3_TiO2_excluded	MM	BS/GS	IF/S	MMBS/GSIF/S
AareBern	Grain23	38.6144	NA	21.1841	NA	29.2635	2.39496	3.44301	5.1001	Cr2O3_TiO2_excluded	IG	NA	IF/S	IGNAIF/S
AareBern	Grain24	39.9892	NA	21.7826	NA	29.3054	4.67882	3.01209	1.23186	Cr2O3_TiO2_excluded	MM	AM	IF/S	MMAMIF/S
AareBern	Grain25	37.4705	NA	20.6519	NA	24.7887	8.61321	1.84887	6.62677	Cr2O3_TiO2_excluded	MM	BS/GS	IF/S	MMBS/GSIF/S
AareBern	Grain26	39.4378	NA	20.5522	NA	27.6506	1.73905	8.42173	2.19855	Cr2O3_TiO2_excluded	MM	GR	IF/S	MMGRIF/S
AareBern	Grain27	37.4939	NA	20.0759	NA	30.0589	6.44744	3.43143	2.49252	Cr2O3_TiO2_excluded	MM	AM	IF/S	MMAMIF/S
AareBern	Grain28	41.5426	NA	18.9926	NA	28.0806	4.05532	0.860331	6.46851	Cr2O3_TiO2_excluded	MM	BS/GS	IF/S	MMBS/GSIF/S
AareBern	Grain29	38.4063	NA	19.3709	NA	33.1502	3.06634	3.52655	2.47967	Cr2O3_TiO2_excluded	MM	AM	IF/S	MMAMIF/S
AareBern	Grain3	30.1359	NA	50.8648	NA	15.9388	1.27745	1.4148	0.368292	Cr2O3_TiO2_excluded	MM	AM	IF/S	MMAMIF/S
AareBern	Grain30	38.5371	NA	21.6236	NA	31.7339	1.95743	3.39835	2.7496	Cr2O3_TiO2_excluded	MM	AM	IF/S	MMAMIF/S
AareBern	Grain31	37.3895	NA	20.5516	NA	33.7501	3.4636	3.43929	1.40585	Cr2O3_TiO2_excluded	IG	NA	IF/S	IGNAIF/S
AareBern	Grain32	39.3622	NA	20.4403	NA	28.4166	6.21627	1.83524	3.72938	Cr2O3_TiO2_excluded	MM	AM	IF/S	MMAMIF/S
AareBern	Grain33	36.0455	NA	18.286	NA	38.0111	1.70565	4.05316	1.89858	Cr2O3_TiO2_excluded	MM	AM	IF/S	MMAMIF/S
AareBern	Grain34	40.6171	NA	21.333	NA	28.5368	3.19333	4.41653	1.90321	Cr2O3_TiO2_excluded	MM	AM	IF/S	MMAMIF/S
AareBern	Grain35	38.7838	NA	20.723	NA	29.7727	2.91031	2.14838	5.66172	Cr2O3_TiO2_excluded	MM	AM	IF/S	MMAMIF/S
AareBern	Grain36	38.3039	NA	19.2568	NA	33.4527	3.73458	2.45137	2.8007	Cr2O3_TiO2_excluded	MM	AM	IF/S	MMAMIF/S
AareBern	Grain37	39.7625	NA	21.1186	NA	20.1941	2.47945	4.83646	11.609	Cr2O3_TiO2_excluded	MM	EC/UHP	M	MMEC/UHPM
AareBern	Grain38	40.094	NA	20.3774	NA	30.1676	3.74653	4.3122	1.30221	Cr2O3_TiO2_excluded	MM	AM	IF/S	MMAMIF/S
AareBern	Grain39	38.2563	NA	20.7068	NA	30.9689	2.48896	3.28651	4.29256	Cr2O3_TiO2_excluded	MM	AM	IF/S	MMAMIF/S
AareBern	Grain4	39.4071	NA	21.1658	NA	30.332	1.236	2.96018	4.89892	Cr2O3_TiO2_excluded	IG	NA	IF/S	IGNAIF/S
AareBern	Grain40	39.96	NA	19.6871	NA	29.4952	1.71854	6.00136	3.13777	Cr2O3_TiO2_excluded	MM	AM	IF/S	MMAMIF/S
AareBern	Grain41	40.632	NA	21.2395	NA	30.116	2.91002	3.76736	1.3351	Cr2O3_TiO2_excluded	MM	AM	IF/S	MMAMIF/S
AareBern	Grain42	36.7814	NA	20.0358	NA	31.5225	7.58851	3.17792	0.893814	Cr2O3_TiO2_excluded	IG	NA	IF/S	IGNAIF/S
AareBern	Grain43	40.1012	NA	19.4188	NA	31.2083	4.52194	3.21451	1.53528	Cr2O3_TiO2_excluded	MM	AM	IF/S	MMAMIF/S
AareBern	Grain44	37.7159	NA	20.8061	NA	31.0084	4.56446	3.22332	2.68181	Cr2O3_TiO2_excluded	MM	AM	IF/S	MMAMIF/S
AareBern	Grain45	37.7169	NA	20.0701	NA	34.9387	1.95939	3.87368	1.44123	Cr2O3_TiO2_excluded	MM	GR	IF/S	MMGRIF/S
AareBern	Grain46	36.7304	NA	19.1398	NA	38.016	0.830477	2.69599	2.58728	Cr2O3_TiO2_excluded	MM	GR	IF/S	MMGRIF/S
AareBern	Grain47	36.7222	NA	20.8662	NA	31.4223	2.3007	5.13415	3.55451	Cr2O3_TiO2_excluded	MM	AM	IF/S	MMAMIF/S
AareBern	Grain48	37.7648	NA	21.3676	NA	33.1255	1.13142	2.8304	3.78028	Cr2O3_TiO2_excluded	MM	AM	IF/S	MMAMIF/S
AareBern	Grain49	38.333	NA	19.3729	NA	28.926	7.62583	2.14612	3.59617	Cr2O3_TiO2_excluded	MM	AM	IF/S	MMAMIF/S
AareBern	Grain5	39.9733	NA	21.7818	NA	21.4522	1.61774	8.41502	6.75986	Cr2O3_TiO2_excluded	MM	GR	M	MMGRM
AareBern	Grain50	39.3776	NA	20.04	NA	31.154	1.92172	4.6089	2.89783	Cr2O3_TiO2_excluded	MM	AM	IF/S	MMAMIF/S
AareBern	Grain51	38.0199	NA	20.2601	NA	31.5477	2.93269	5.25186	1.98779	Cr2O3_TiO2_excluded	MM	AM	IF/S	MMAMIF/S
AareBern	Grain52	38.0603	NA	20.3141	NA	33.618	3.01793	2.38628	2.60342	Cr2O3_TiO2_excluded	MM	AM	IF/S	MMAMIF/S
AareBern	Grain53	38.8959	NA	21.0286	NA	25.7498	1.49456	5.01998	7.81119	Cr2O3_TiO2_excluded	MM	GR	M	MMGRM
AareBern	Grain54	39.3205	NA	20.7657	NA	29.5899	3.26094	1.39596	5.66691	Cr2O3_TiO2_excluded	MM	BS/GS	IF/S	MMBS/GSIF/S
AareBern	Grain55	39.0525	NA	19.5325	NA	31.3598	2.2703	4.32004	3.46482	Cr2O3_TiO2_excluded	MM	AM	IF/S	MMAMIF/S
AareBern	Grain56	37.0867	NA	20.2083	NA	32.4713	5.99814	2.28299	1.95254	Cr2O3_TiO2_excluded	MM	AM	IF/S	MMAMIF/S
AareBern	Grain57	38.3566	NA	22.0296	NA	30.1612	2.26171	5.48154	1.70931	Cr2O3_TiO2_excluded	IG	NA	IF/S	IGNAIF/S
AareBern	Grain58	37.9476	NA	18.5771	NA	33.4864	4.02455	5.00886	0.955522	Cr2O3_TiO2_excluded	MM	AM	IF/S	MMAMIF/S
AareBern	Grain59	35.7244	NA	20.6842	NA	34.53	3.06148	2.07338	3.92657	Cr2O3_TiO2_excluded	MM	AM	IF/S	MMAMIF/S
AareBern	Grain6	37.0742	NA	20.4233	NA	32.9971	4.70398	3.63997	1.16142	Cr2O3_TiO2_excluded	MM	AM	IF/S	MMAMIF/S
AareBern	Grain60	37.0118	NA	19.7409	NA	36.8726	1.51365	3.35293	1.50813	Cr2O3_TiO2_excluded	IG	NA	IF/S	IGNAIF/S
AareBern	Grain61	37.5684	NA	19.2674	NA	35.0861	1.89242	3.61626	2.56952	Cr2O3_TiO2_excluded	MM	AM	IF/S	MMAMIF/S
AareBern	Grain62	37.4929	NA	19.6065	NA	32.3477	5.17634	1.92667	3.44991	Cr2O3_TiO2_excluded	MM	AM	IF/S	MMAMIF/S
AareBern	Grain63	38.6197	NA	21.4401	NA	32.3187	2.00645	2.17914	3.43583	Cr2O3_TiO2_excluded	MM	AM	IF/S	MMAMIF/S
AareBern	Grain64	38.8544	NA	20.3749	NA	26.7098	3.53421	2.20111	8.32556	Cr2O3_TiO2_excluded	MM	BS/GS	IF/S	MMBS/GSIF/S
AareBern	Grain65	38.6404	NA	19.8669	NA	34.9372	1.38371	1.27582	3.89592	Cr2O3_TiO2_excluded	MM	BS/GS	IF/S	MMBS/GSIF/S
AareBern	Grain66	41.6947	NA	19.4699	NA	30.1558	2.915	2.65676	3.10782	Cr2O3_TiO2_excluded	MM	AM	IF/S	MMAMIF/S
AareBern	Grain67	38.0556	NA	20.3288	NA	28.0409	3.90149	2.33428	7.33896	Cr2O3_TiO2_excluded	MM	AM	IF/S	MMAMIF/S
AareBern	Grain68	38.7932	NA	20.2439	NA	29.9099	2.76221	3.33606	4.95469	Cr2O3_TiO2_excluded	IG	NA	IF/S	IGNAIF/S
AareBern	Grain69	37.6257	NA	19.5656	NA	33.7632	3.41939	3.95225	1.67379	Cr2O3_TiO2_excluded	MM	GR	IF/S	MMGRIF/S
AareBern	Grain7	39.0801	NA	20.151	NA	32.2258	2.51881	3.12899	2.89525	Cr2O3_TiO2_excluded	MM	AM	IF/S	MMAMIF/S
AareBern	Grain70	38.1204	NA	20.3992	NA	30.7708	1.76344	4.03975	4.90637	Cr2O3_TiO2_excluded	IG	NA	IF/S	IGNAIF/S
AareBern	Grain71	38.466	NA	20.3069	NA	30.051	4.1335	1.45333	5.58927	Cr2O3_TiO2_excluded	MM	AM	IF/S	MMAMIF/S
AareBern	Grain72	37.0149	NA	18.8942	NA	30.3343	2.0901	0.417547	11.2489	Cr2O3_TiO2_excluded	IG	NA	M	IGNAM
AareBern	Grain73	39.1176	NA	20.9079	NA	29.8107	1.9435	5.68524	2.53503	Cr2O3_TiO2_excluded	MM	AM	IF/S	MMAMIF/S
AareBern	Grain74	37.3066	NA	19.5227	NA	33.6847	2.53758	4.73894	2.20943	Cr2O3_TiO2_excluded	MM	AM	IF/S	MMAMIF/S
AareBern	Grain75	37.7021	NA	18.6408	NA	32.9652	4.09508	4.13859	2.45829	Cr2O3_TiO2_excluded	MM	AM	IF/S	MMAMIF/S
AareBern	Grain76	37.6468	NA	20.088	NA	33.924	1.39705	3.36592	3.57825	Cr2O3_TiO2_excluded	IG	NA	IF/S	IGNAIF/S
AareBern	Grain77	36.6661	NA	20.2351	NA	33.8034	3.56636	3.98866	1.74035	Cr2O3_TiO2_excluded	MM	GR	IF/S	MMGRIF/S
AareBern	Grain78	36.3877	NA	21.8287	NA	28.5067	8.63908	2.25388	2.38391	Cr2O3_TiO2_excluded	MM	AM	IF/S	MMAMIF/S
AareBern	Grain79	38.2772	NA	20.093	NA	34.6951	1.24408	3.3597	2.33086	Cr2O3_TiO2_excluded	IG	NA	IF/S	IGNAIF/S
AareBern	Grain8	43.0458	NA	25.4594	NA	13.562	1.25449	0.225854	16.4525	Cr2O3_TiO2_excluded	MM	BS/GS	IF/S	MMBS/GSIF/S
AareBern	Grain80	39.1598	NA	21.2551	NA	28.7184	1.94869	4.34505	4.57309	Cr2O3_TiO2_excluded	IG	NA	IF/S	IGNAIF/S
AareBern	Grain81	37.9352	NA	19.8743	NA	32.8212	2.36155	2.61718	4.39063	Cr2O3_TiO2_excluded	MM	AM	IF/S	MMAMIF/S
AareBern	Grain82	36.5899	NA	20.9871	NA	33.1751	3.44737	4.72951	1.07097	Cr2O3_TiO2_excluded	MM	GR	IF/S	MMGRIF/S
AareBern	Grain9	38.7923	NA	20.4156	NA	32.2032	1.51677	1.09764	5.97439	Cr2O3_TiO2_excluded	MM	BS/GS	IF/S	MMBS/GSIF/S
Sarine	Mount1 Grain568	38.5497	0.0385755	21.47	<0.03	33.4487	0.511947	1.34281	4.08449	all_oxides	MM	BS/GS	IF/S	MMBS/GSIF/S
Sarine	Mount1 Grain569	37.3509	<0.03	21.5293	<0.03	34.3758	2.29891	1.47075	2.53435	ln(TiO2/Cr2O3)_excluded	MM	AM	IF/S	MMAMIF/S
Sarine	Mount1 Grain570	37.7756	<0.03	21.7339	<0.03	33.8175	1.70712	3.41322	1.42247	ln(TiO2/Cr2O3)_excluded	MM	AM	IF/S	MMAMIF/S
Sarine	Mount1 Grain571	37.1332	<0.03	21.0064	<0.03	31.5815	6.14766	2.43236	0.805594	ln(TiO2/Cr2O3)_excluded	IG	NA	IF/S	IGNAIF/S
Sarine	Mount1 Grain572	36.3885	0.0568548	21.034	<0.03	23.5033	10.4499	0.42331	7.99509	all_oxides	MM	BS/GS	IF/S	MMBS/GSIF/S
Sarine	Mount1 Grain573	37.7655	0.0395081	21.5219	<0.03	33.5158	1.69825	2.97976	2.13905	all_oxides	MM	AM	IF/S	MMAMIF/S
Sarine	Mount1 Grain574	37.8392	<0.03	21.3488	<0.03	35.6527	2.12565	2.18707	0.695063	ln(TiO2/Cr2O3)_excluded	MM	AM	IF/S	MMAMIF/S
Sarine	Mount1 Grain575	37.9046	<0.03	21.7194	<0.03	34.7375	0.837832	3.52613	1.13752	ln(TiO2/Cr2O3)_excluded	MM	GR	IF/S	MMGRIF/S
Sarine	Mount1 Grain576	39.2388	<0.03	22.6216	0.0347927	27.1506	0.714405	8.99683	1.13282	all_oxides	MM	GR	IF/S	MMGRIF/S
Sarine	Mount1 Grain577	37.9946	<0.03	21.7263	<0.03	32.2281	3.06899	3.65478	1.2249	ln(TiO2/Cr2O3)_excluded	MM	AM	IF/S	MMAMIF/S
Sarine	Mount1 Grain578	37.4201	<0.03	22.0671	<0.03	32.4316	1.73093	4.94557	1.14486	ln(TiO2/Cr2O3)_excluded	MM	GR	IF/S	MMGRIF/S
Sarine	Mount1 Grain579	35.6483	<0.03	22.2981	<0.03	33.8231	3.98585	2.47116	1.39894	ln(TiO2/Cr2O3)_excluded	MM	AM	IF/S	MMAMIF/S
Sarine	Mount1 Grain580	38.3892	<0.03	21.9907	0.0625321	30.9216	0.936661	5.69921	1.91641	all_oxides	MM	GR	IF/S	MMGRIF/S
Sarine	Mount1 Grain581	38.6302	<0.03	22.2261	<0.03	28.6046	1.75507	7.14147	1.54731	ln(TiO2/Cr2O3)_excluded	MM	GR	IF/S	MMGRIF/S
Sarine	Mount1 Grain582	37.9812	<0.03	21.9252	<0.03	32.4662	1.07535	5.19139	1.24888	ln(TiO2/Cr2O3)_excluded	MM	GR	IF/S	MMGRIF/S
Sarine	Mount1 Grain583	37.6127	<0.03	21.4027	<0.03	35.4045	2.618	2.02893	0.714075	ln(TiO2/Cr2O3)_excluded	MM	AM	IF/S	MMAMIF/S
Sarine	Mount1 Grain584	37.3471	<0.03	22.0093	<0.03	33.0946	1.86332	4.29594	1.2004	ln(TiO2/Cr2O3)_excluded	MM	GR	IF/S	MMGRIF/S
Sarine	Mount1 Grain585	36.0798	<0.03	21.557	<0.03	27.1703	10.1597	2.65037	1.9598	ln(TiO2/Cr2O3)_excluded	MM	AM	IF/S	MMAMIF/S
Sarine	Mount1 Grain586	37.7653	<0.03	21.5097	<0.03	28.6951	7.15852	3.79731	0.984234	ln(TiO2/Cr2O3)_excluded	MM	AM	IF/S	MMAMIF/S
Sarine	Mount1 Grain587	35.6274	<0.03	22.4798	<0.03	29.0714	7.3934	3.90727	1.07769	ln(TiO2/Cr2O3)_excluded	MM	AM	IF/S	MMAMIF/S
Sarine	Mount1 Grain588	38.178	<0.03	21.5228	<0.03	35.0108	1.83699	2.41019	0.925966	ln(TiO2/Cr2O3)_excluded	MM	AM	IF/S	MMAMIF/S
Sarine	Mount1 Grain589	38.0738	<0.03	21.2624	<0.03	32.1197	3.61398	2.92927	1.76194	ln(TiO2/Cr2O3)_excluded	MM	AM	IF/S	MMAMIF/S
Sarine	Mount1 Grain590	35.4919	0.0467185	21.6795	<0.03	33.3387	2.20085	1.79432	4.83613	all_oxides	MM	AM	IF/S	MMAMIF/S
Sarine	Mount1 Grain591	37.8461	<0.03	20.8863	<0.03	30.2978	1.45689	2.60978	6.47317	ln(TiO2/Cr2O3)_excluded	MM	AM	IF/S	MMAMIF/S
Sarine	Mount1 Grain592	37.507	<0.03	21.6942	<0.03	34.821	1.74308	2.66422	1.48867	ln(TiO2/Cr2O3)_excluded	MM	AM	IF/S	MMAMIF/S
Sarine	Mount1 Grain593	37.6029	0.0776767	20.4237	<0.03	15.3669	22.7186	0.482234	3.28368	all_oxides	MM	BS/GS	IF/S	MMBS/GSIF/S
Sarine	Mount1 Grain594	37.3519	<0.03	20.7652	<0.03	34.6692	3.69646	2.31697	1.0221	ln(TiO2/Cr2O3)_excluded	MM	AM	IF/S	MMAMIF/S
Sarine	Mount1 Grain595	37.2845	<0.03	21.4632	<0.03	32.1436	4.52398	2.91731	1.37856	ln(TiO2/Cr2O3)_excluded	MM	AM	IF/S	MMAMIF/S
Sarine	Mount1 Grain596	35.899	0.0455506	21.9652	<0.03	37.4263	0.129991	2.77578	0.551017	all_oxides	MM	AM	IF/S	MMAMIF/S
Sarine	Mount1 Grain597	37.0565	0.0881329	20.5072	<0.03	26.5224	10.2564	0.640591	4.76759	all_oxides	MM	BS/GS	IF/S	MMBS/GSIF/S
Sarine	Mount1 Grain598	37.6436	<0.03	21.0849	<0.03	32.2346	5.94977	1.77159	0.96115	ln(TiO2/Cr2O3)_excluded	MM	AM	IF/S	MMAMIF/S
Sarine	Mount1 Grain599	37.7401	<0.03	21.1647	<0.03	32.9444	1.09199	0.959699	5.3039	ln(TiO2/Cr2O3)_excluded	MM	BS/GS	IF/S	MMBS/GSIF/S
Sarine	Mount1 Grain600	37.2362	0.0499242	21.5299	<0.03	34.3663	0.35475	1.73396	4.47607	all_oxides	MM	EC/UHP	IF/S	MMEC/UHPIF/S
Sarine	Mount1 Grain601	37.1066	<0.03	21.3793	<0.03	35.1242	1.97782	1.87273	1.92098	ln(TiO2/Cr2O3)_excluded	MM	AM	IF/S	MMAMIF/S
Sarine	Mount1 Grain602	36.7419	0.0448217	21.225	<0.03	27.0489	8.74692	0.769674	4.95094	all_oxides	MM	BS/GS	IF/S	MMBS/GSIF/S
Sarine	Mount1 Grain603	37.0375	<0.03	21.6925	<0.03	34.4611	1.34177	2.48341	2.66127	ln(TiO2/Cr2O3)_excluded	MM	AM	IF/S	MMAMIF/S
Sarine	Mount1 Grain604	37.1064	0.0614303	21.3074	<0.03	28.7315	6.57047	1.35871	4.66127	all_oxides	MM	BS/GS	IF/S	MMBS/GSIF/S
Sarine	Mount1 Grain605	37.7313	0.0514211	21.3684	<0.03	34.6132	0.552632	2.35994	2.99518	all_oxides	MM	AM	IF/S	MMAMIF/S
Sarine	Mount1 Grain606	37.3335	0.0534194	21.2702	<0.03	31.9214	2.71254	2.41001	4.03155	all_oxides	MM	AM	IF/S	MMAMIF/S
Sarine	Mount1 Grain607	37.0546	0.0744751	21.3187	<0.03	31.308	2.73193	2.17862	4.86622	all_oxides	MM	AM	IF/S	MMAMIF/S
Sarine	Mount1 Grain609	35.5703	0.169668	14.5258	<0.03	13.465	0.590211	0.122629	35.5018	all_oxides	MS	NA	CS/MS	MSNACS/MS
Sarine	Mount1 Grain610	38.4459	<0.03	22.4141	<0.03	30.3478	0.478515	7.36352	0.765632	ln(TiO2/Cr2O3)_excluded	MM	GR	IF/S	MMGRIF/S
Sarine	Mount1 Grain612	38.6704	0.0551582	22.5861	<0.03	20.6896	0.526754	8.98517	8.12908	all_oxides	MM	EC/UHP	M	MMEC/UHPM
Sarine	Mount1 Grain613	37.7776	0.03093	21.5902	<0.03	35.8256	0.195232	2.34929	2.08008	all_oxides	MM	AM	IF/S	MMAMIF/S
Sarine	Mount1 Grain614	37.253	0.0344278	21.4682	<0.03	33.301	3.05479	2.08345	2.60546	all_oxides	MM	AM	IF/S	MMAMIF/S
Sarine	Mount1 Grain615	35.119	0.0718877	19.8809	<0.03	16.9741	25.2617	0.30207	1.05975	all_oxides	IG	NA	IF/S	IGNAIF/S
Sarine	Mount1 Grain616	36.9999	<0.03	21.5019	0.0405275	29.8879	7.24884	2.4833	1.49135	all_oxides	MM	AM	IF/S	MMAMIF/S
Sarine	Mount1 Grain617	36.9017	<0.03	21.9254	<0.03	35.0635	1.20721	3.05891	1.42619	ln(TiO2/Cr2O3)_excluded	MM	AM	IF/S	MMAMIF/S
Sarine	Mount1 Grain618	37.9305	<0.03	22.5031	<0.03	31.2721	1.20824	5.7807	1.1243	ln(TiO2/Cr2O3)_excluded	MM	GR	IF/S	MMGRIF/S
Sarine	Mount1 Grain620	37.8132	<0.03	22.1228	<0.03	30.7921	1.96718	5.02065	2.17959	ln(TiO2/Cr2O3)_excluded	MM	AM	IF/S	MMAMIF/S
Sarine	Mount1 Grain621	37.2245	<0.03	21.7952	<0.03	33.6528	2.39107	2.83899	1.9418	ln(TiO2/Cr2O3)_excluded	MM	AM	IF/S	MMAMIF/S
Sarine	Mount1 Grain622	37.3435	<0.03	21.9945	0.0302748	33.3724	2.41524	3.63663	1.04134	all_oxides	MM	AM	IF/S	MMAMIF/S
Sarine	Mount1 Grain623	37.3297	<0.03	21.923	<0.03	33.7419	2.65691	3.02964	1.18029	ln(TiO2/Cr2O3)_excluded	MM	AM	IF/S	MMAMIF/S
Sarine	Mount1 Grain624	37.2849	<0.03	21.6242	<0.03	33.3287	0.832503	2.17984	4.48735	ln(TiO2/Cr2O3)_excluded	MM	BS/GS	IF/S	MMBS/GSIF/S
Sarine	Mount1 Grain625	37.1092	0.0568316	21.4893	<0.03	34.242	0.825599	1.93323	3.85785	all_oxides	MM	AM	IF/S	MMAMIF/S
Sarine	Mount1 Grain626	37.6014	<0.03	21.7815	0.0520227	31.3852	3.42175	2.85805	2.754	all_oxides	MM	AM	IF/S	MMAMIF/S
Sarine	Mount1 Grain627	37.0922	<0.03	21.3889	<0.03	32.517	4.68211	2.84195	1.3762	ln(TiO2/Cr2O3)_excluded	MM	AM	IF/S	MMAMIF/S
Sarine	Mount1 Grain628	36.2005	<0.03	21.5045	<0.03	30.5761	2.53339	2.83096	4.50872	ln(TiO2/Cr2O3)_excluded	MM	AM	IF/S	MMAMIF/S
Sarine	Mount1 Grain629	35.6051	0.0442467	21.67	<0.03	26.7707	4.5463	1.01336	9.67713	all_oxides	MM	AM	IF/S	MMAMIF/S
Sarine	Mount1 Grain630	36.9129	<0.03	21.8702	<0.03	31.5898	5.10887	2.60636	1.7622	ln(TiO2/Cr2O3)_excluded	MM	AM	IF/S	MMAMIF/S
Sarine	Mount1 Grain631	35.7272	0.0514277	21.8029	<0.03	23.1325	1.80323	2.61477	14.618	all_oxides	MM	EC/UHP	M	MMEC/UHPM
Sarine	Mount1 Grain632	35.2642	<0.03	21.8088	<0.03	31.0632	10.7796	0.652386	0.266486	ln(TiO2/Cr2O3)_excluded	IG	NA	IF/S	IGNAIF/S
Sarine	Mount1 Grain633	36.7757	<0.03	22.0981	<0.03	33.4428	1.33889	2.99707	3.10485	ln(TiO2/Cr2O3)_excluded	MM	AM	IF/S	MMAMIF/S
Sarine	Mount1 Grain634	36.4811	<0.03	21.8272	<0.03	34.2039	2.65387	3.37335	1.29964	ln(TiO2/Cr2O3)_excluded	MM	AM	IF/S	MMAMIF/S
Sarine	Mount1 Grain635	35.9557	<0.03	22.3659	<0.03	36.5016	0.397029	2.76719	1.51821	ln(TiO2/Cr2O3)_excluded	MM	AM	IF/S	MMAMIF/S
Sarine	Mount1 Grain636	36.8401	<0.03	22.1643	<0.03	29.4314	5.37788	3.52854	2.56345	ln(TiO2/Cr2O3)_excluded	MM	AM	IF/S	MMAMIF/S
Sarine	Mount1 Grain637	36.1391	0.0866273	22.0691	<0.03	33.5023	1.35371	3.73532	2.69936	all_oxides	IG	NA	IF/S	IGNAIF/S
Sarine	Mount1 Grain638	35.0185	0.0769432	22.0574	<0.03	32.065	2.09539	1.23266	7.0294	all_oxides	MM	BS/GS	IF/S	MMBS/GSIF/S
Sarine	Mount1 Grain639	35.9506	<0.03	22.6328	<0.03	34.7002	2.02432	3.46235	1.07076	ln(TiO2/Cr2O3)_excluded	MM	AM	IF/S	MMAMIF/S
Sarine	Mount1 Grain640	37.2524	<0.03	23.6603	<0.03	26.4204	0.541989	10.7554	1.16185	ln(TiO2/Cr2O3)_excluded	MM	GR	IF/S	MMGRIF/S
Sarine	Mount1 Grain641	35.6577	0.0714791	21.9019	<0.03	35.0924	0.333938	1.35661	5.32983	all_oxides	MM	EC/UHP	IF/S	MMEC/UHPIF/S
Sarine	Mount1 Grain642	35.2126	0.0744038	22.1429	<0.03	32.7191	1.32158	0.69764	7.50121	all_oxides	MM	BS/GS	M	MMBS/GSM
Sarine	Mount1 Grain643	36.5714	<0.03	22.1334	<0.03	29.9535	1.55749	2.74654	6.78532	ln(TiO2/Cr2O3)_excluded	MM	AM	IF/S	MMAMIF/S
Sarine	Mount1 Grain644	35.5366	<0.03	22.5588	<0.03	35.3711	1.32568	2.34511	2.51171	ln(TiO2/Cr2O3)_excluded	MM	AM	IF/S	MMAMIF/S
Sarine	Mount1 Grain645	36.603	<0.03	23.4186	<0.03	30.1805	0.807643	7.61593	1.27206	ln(TiO2/Cr2O3)_excluded	MM	GR	IF/S	MMGRIF/S
Sarine	Mount1 Grain646	34.7972	<0.03	23.1364	<0.03	33.4654	2.13312	4.37	1.98694	ln(TiO2/Cr2O3)_excluded	MM	AM	IF/S	MMAMIF/S
Sarine	Mount1 Grain647	35.0229	<0.03	23.0993	<0.03	32.1682	1.8944	3.95353	3.79578	ln(TiO2/Cr2O3)_excluded	MM	AM	IF/S	MMAMIF/S
Sarine	Mount1 Grain648	32.8151	0.0578968	23.0125	<0.03	33.3683	6.68874	0.329807	3.65943	all_oxides	MM	BS/GS	IF/S	MMBS/GSIF/S
Sarine	Mount1 Grain649	34.0399	0.0433651	23.1063	<0.03	31.1262	0.889937	2.8059	7.6995	all_oxides	MM	AM	M	MMAMM
Sarine	Mount1 Grain650	35.2477	<0.03	22.618	<0.03	34.5592	2.46248	2.21225	2.60897	ln(TiO2/Cr2O3)_excluded	MM	AM	IF/S	MMAMIF/S
Sarine	Mount1 Grain651	32.2516	<0.03	23.7133	<0.03	32.3906	7.91579	2.388	1.16485	ln(TiO2/Cr2O3)_excluded	MM	AM	IF/S	MMAMIF/S
Sarine	Mount1 Grain652	31.5131	0.117209	23.734	<0.03	29.8474	6.07184	2.55986	5.67232	all_oxides	MM	AM	IF/S	MMAMIF/S
Sarine	Mount1 Grain653	31.7827	0.0327673	24.2102	<0.03	38.6184	1.01946	2.80648	1.06058	all_oxides	MM	AM	IF/S	MMAMIF/S
Sarine	Mount1 Grain654	21.189	0.0562272	30.5826	<0.03	39.2664	1.30614	1.07844	6.19887	all_oxides	MM	BS/GS	IF/S	MMBS/GSIF/S
Sarine	Mount1 Grain655	30.7835	<0.03	26.028	0.0484009	30.8064	1.15362	10.0378	0.982157	all_oxides	MM	GR	IF/S	MMGRIF/S
V024	Mount1 Grain414	37.595	<0.03	21.5573	<0.03	31.9521	4.34894	2.78947	1.63752	ln(TiO2/Cr2O3)_excluded	MM	AM	IF/S	MMAMIF/S
V024	Mount1 Grain415	36.5129	0.039206	20.8934	<0.03	25.9019	10.6973	1.52847	4.24259	all_oxides	MM	AM	IF/S	MMAMIF/S
V024	Mount1 Grain416	37.8868	<0.03	21.7536	<0.03	29.1125	1.11513	3.02302	6.92388	ln(TiO2/Cr2O3)_excluded	MM	AM	M	MMAMM
V024	Mount1 Grain417	38.1964	0.158951	22.1268	<0.03	20.0708	0.423364	7.31764	11.0203	all_oxides	MM	EC/UHP	M	MMEC/UHPM
V024	Mount1 Grain418	37.8193	<0.03	21.6712	<0.03	32.7413	1.49626	2.97685	3.18163	ln(TiO2/Cr2O3)_excluded	MM	AM	IF/S	MMAMIF/S
V024	Mount1 Grain419	37.5401	<0.03	21.8092	<0.03	33.8558	1.9101	2.95975	1.84199	ln(TiO2/Cr2O3)_excluded	MM	AM	IF/S	MMAMIF/S
V024	Mount1 Grain420	37.5597	<0.03	21.5018	<0.03	31.8045	3.5517	3.09204	2.29959	ln(TiO2/Cr2O3)_excluded	MM	AM	IF/S	MMAMIF/S
V024	Mount1 Grain421	36.6078	0.0765519	21.3811	<0.03	28.2257	6.43975	0.949082	6.22122	all_oxides	MM	BS/GS	IF/S	MMBS/GSIF/S
V024	Mount1 Grain422	37.2746	0.0336677	25.928	<0.03	11.1972	0.150734	0.0342466	25.2688	all_oxides	MS	NA	CS/MS	MSNACS/MS
V024	Mount1 Grain423	37.509	0.0388482	21.7985	<0.03	32.8759	0.479423	2.81894	4.11456	all_oxides	MM	AM	IF/S	MMAMIF/S
V024	Mount1 Grain424	37.3578	<0.03	21.6367	<0.03	33.7168	1.8266	3.25696	1.92701	ln(TiO2/Cr2O3)_excluded	MM	AM	IF/S	MMAMIF/S
V024	Mount1 Grain425	36.8677	0.0597531	21.367	<0.03	32.4226	4.82859	1.21611	2.95381	all_oxides	MM	BS/GS	IF/S	MMBS/GSIF/S
V024	Mount1 Grain426	37.345	<0.03	21.6565	<0.03	35.4955	1.79848	2.41904	1.1328	ln(TiO2/Cr2O3)_excluded	MM	AM	IF/S	MMAMIF/S
V024	Mount1 Grain427	37.7792	<0.03	22.0615	<0.03	32.2436	0.631521	4.5173	2.60776	ln(TiO2/Cr2O3)_excluded	MM	AM	IF/S	MMAMIF/S
V024	Mount1 Grain428	40.8497	0.0433298	20.3259	<0.03	26.1819	6.55205	2.22032	3.64933	all_oxides	MM	AM	IF/S	MMAMIF/S
V024	Mount1 Grain429	37.4671	<0.03	21.3904	<0.03	28.5628	5.5221	2.07204	4.67479	ln(TiO2/Cr2O3)_excluded	MM	AM	IF/S	MMAMIF/S
V024	Mount1 Grain430	37.4745	<0.03	21.9759	<0.03	33.1237	1.89803	3.95465	1.4748	ln(TiO2/Cr2O3)_excluded	MM	AM	IF/S	MMAMIF/S
V024	Mount1 Grain431	36.9038	<0.03	20.9925	7.02933e-05	27.3085	11.4624	1.58236	1.29886	all_oxides	IG	NA	IF/S	IGNAIF/S
V024	Mount1 Grain432	37.9175	<0.03	21.5224	<0.03	31.6489	3.19044	3.19247	2.35024	ln(TiO2/Cr2O3)_excluded	MM	AM	IF/S	MMAMIF/S
V024	Mount1 Grain433	38.0929	<0.03	22.469	<0.03	31.1665	0.990567	6.11142	0.968711	ln(TiO2/Cr2O3)_excluded	MM	GR	IF/S	MMGRIF/S
V024	Mount1 Grain434	39.0451	<0.03	22.917	<0.03	26.5945	0.590584	9.69262	0.989227	ln(TiO2/Cr2O3)_excluded	MM	GR	IF/S	MMGRIF/S
V024	Mount1 Grain435	37.9636	<0.03	21.7732	<0.03	31.7219	3.17481	3.6736	1.58759	ln(TiO2/Cr2O3)_excluded	MM	AM	IF/S	MMAMIF/S
V024	Mount1 Grain436	36.5283	0.0560932	21.0403	<0.03	24.8771	7.81646	0.603157	8.29237	all_oxides	MM	BS/GS	IF/S	MMBS/GSIF/S
V024	Mount1 Grain437	37.0686	<0.03	21.5746	<0.03	34.0044	2.13881	2.67709	2.13094	ln(TiO2/Cr2O3)_excluded	MM	AM	IF/S	MMAMIF/S
V024	Mount1 Grain438	36.1363	0.090081	21.5634	<0.03	29.4644	2.44883	0.92268	9.05163	all_oxides	MM	BS/GS	IF/S	MMBS/GSIF/S
V024	Mount1 Grain439	38.3725	0.0794916	20.8126	<0.03	28.8744	1.66744	0.686603	9.22182	all_oxides	MM	BS/GS	M	MMBS/GSM
V024	Mount1 Grain440	37.0875	<0.03	21.1275	<0.03	28.6145	10.8046	1.52509	0.640854	ln(TiO2/Cr2O3)_excluded	IG	NA	IF/S	IGNAIF/S
V024	Mount1 Grain441	37.9806	<0.03	22.0675	<0.03	32.1828	1.72586	4.21403	1.74684	ln(TiO2/Cr2O3)_excluded	MM	AM	IF/S	MMAMIF/S
V024	Mount1 Grain442	37.0961	<0.03	21.5099	<0.03	30.2128	7.72058	2.30626	1.04032	ln(TiO2/Cr2O3)_excluded	MM	AM	IF/S	MMAMIF/S
V024	Mount1 Grain443	35.084	<0.03	20.0827	7.74728e-05	16.1065	27.2298	0.104728	1.30222	all_oxides	IG	NA	IF/S	IGNAIF/S
V024	Mount1 Grain444	37.7916	0.0991096	22.1517	<0.03	22.3916	0.575777	6.55043	10.2508	all_oxides	MM	EC/UHP	M	MMEC/UHPM
V024	Mount1 Grain445	38.2011	<0.03	22.2223	<0.03	32.2499	1.04553	5.14537	1.00087	ln(TiO2/Cr2O3)_excluded	MM	GR	IF/S	MMGRIF/S
V024	Mount1 Grain446	37.749	<0.03	21.8386	<0.03	31.8771	3.59605	2.75754	1.9053	ln(TiO2/Cr2O3)_excluded	MM	AM	IF/S	MMAMIF/S
V024	Mount1 Grain447	37.0014	<0.03	22.064	<0.03	29.4118	0.490459	3.25664	7.45611	ln(TiO2/Cr2O3)_excluded	MM	EC/UHP	M	MMEC/UHPM
V024	Mount1 Grain448	37.8827	<0.03	22.2518	<0.03	27.0477	1.09285	4.79472	6.8875	ln(TiO2/Cr2O3)_excluded	MM	EC/UHP	M	MMEC/UHPM
V024	Mount1 Grain449	37.4074	0.0439653	21.6506	<0.03	31.5679	0.975938	2.43873	5.59629	all_oxides	MM	AM	IF/S	MMAMIF/S
V024	Mount1 Grain450	36.979	<0.03	21.9753	<0.03	32.6858	1.58437	1.84224	4.50241	ln(TiO2/Cr2O3)_excluded	MM	BS/GS	IF/S	MMBS/GSIF/S
V024	Mount1 Grain451	38.2877	<0.03	22.0398	<0.03	32.4101	1.8569	4.3	1.0081	ln(TiO2/Cr2O3)_excluded	MM	GR	IF/S	MMGRIF/S
V024	Mount1 Grain452	36.7542	<0.03	21.5687	<0.03	33.0835	4.69755	2.34257	1.46904	ln(TiO2/Cr2O3)_excluded	MM	AM	IF/S	MMAMIF/S
V024	Mount1 Grain453	38.4091	<0.03	22.7095	<0.03	29.1795	0.942372	7.70077	0.917987	ln(TiO2/Cr2O3)_excluded	MM	GR	IF/S	MMGRIF/S
V024	Mount1 Grain454	37.9058	<0.03	21.8714	<0.03	33.5758	0.267178	2.96687	3.19607	ln(TiO2/Cr2O3)_excluded	MM	AM	IF/S	MMAMIF/S
V024	Mount1 Grain455	39.7173	0.0387789	20.7808	<0.03	29.0804	4.04805	2.45558	3.69227	all_oxides	MM	AM	IF/S	MMAMIF/S
V024	Mount1 Grain456	37.1927	0.0537541	21.7229	<0.03	27.1399	1.22086	1.11867	11.4236	all_oxides	MM	BS/GS	IF/S	MMBS/GSIF/S
V024	Mount1 Grain457	37.1961	0.0469297	21.7453	<0.03	30.2349	3.81272	2.30524	4.35411	all_oxides	MM	AM	IF/S	MMAMIF/S
V024	Mount1 Grain458	37.8673	<0.03	22.2503	<0.03	25.2886	0.770904	5.43501	8.24181	ln(TiO2/Cr2O3)_excluded	MM	EC/UHP	M	MMEC/UHPM
V024	Mount1 Grain459	38.0617	<0.03	22.6773	0.0468999	27.5278	0.847941	8.20942	2.5176	all_oxides	MM	GR	IF/S	MMGRIF/S
V024	Mount1 Grain460	37.2066	<0.03	22.0152	<0.03	30.1015	5.74873	3.74978	0.983972	ln(TiO2/Cr2O3)_excluded	MM	AM	IF/S	MMAMIF/S
V024	Mount1 Grain461	38.1191	<0.03	21.9952	<0.03	32.8134	1.75804	3.94103	1.25355	ln(TiO2/Cr2O3)_excluded	MM	GR	IF/S	MMGRIF/S
V024	Mount1 Grain462	36.6078	0.0384702	21.8064	<0.03	34.7587	1.59343	1.52031	3.32027	all_oxides	MM	AM	IF/S	MMAMIF/S
V024	Mount1 Grain463	37.4512	<0.03	21.155	<0.03	29.7038	3.28791	0.877711	6.99552	ln(TiO2/Cr2O3)_excluded	MM	BS/GS	IF/S	MMBS/GSIF/S
V024	Mount1 Grain464	36.9989	0.0448343	21.5101	<0.03	30.4362	2.00628	1.71173	6.67641	all_oxides	MM	AM	IF/S	MMAMIF/S
V024	Mount1 Grain465	37.4048	0.0662213	21.5578	0.0302952	25.5472	1.75618	1.25621	12.2399	all_oxides	MM	BS/GS	IF/S	MMBS/GSIF/S
V024	Mount1 Grain466	37.6952	0.0302155	21.8019	<0.03	36.3808	0.654188	2.13597	1.09123	all_oxides	MM	AM	IF/S	MMAMIF/S
V024	Mount1 Grain467	38.3284	<0.03	22.3807	<0.03	30.2873	1.00489	6.59794	1.23549	ln(TiO2/Cr2O3)_excluded	MM	GR	IF/S	MMGRIF/S
V024	Mount1 Grain468	37.3352	0.0861443	21.1025	<0.03	22.1945	11.2612	0.53111	7.19526	all_oxides	MM	BS/GS	IF/S	MMBS/GSIF/S
V024	Mount1 Grain469	37.3961	0.0358125	21.4585	<0.03	33.6847	3.87325	1.35147	1.87697	all_oxides	MM	BS/GS	IF/S	MMBS/GSIF/S
V024	Mount1 Grain470	37.0771	0.0853488	21.1298	<0.03	28.1102	5.65461	1.37967	6.25701	all_oxides	MM	BS/GS	IF/S	MMBS/GSIF/S
V024	Mount1 Grain471	36.8567	0.109084	21.105	<0.03	23.549	5.44067	0.443329	12.2493	all_oxides	MM	BS/GS	IF/S	MMBS/GSIF/S
V024	Mount1 Grain472	37.3861	<0.03	21.7772	<0.03	32.9542	2.55951	3.32404	0.857626	ln(TiO2/Cr2O3)_excluded	MM	AM	IF/S	MMAMIF/S
V024	Mount1 Grain473	37.733	<0.03	22.0785	<0.03	31.9445	1.07941	4.16311	2.87852	ln(TiO2/Cr2O3)_excluded	MM	AM	IF/S	MMAMIF/S
V024	Mount1 Grain474	38.6453	<0.03	22.5792	<0.03	30.1388	0.528748	7.12617	0.796344	ln(TiO2/Cr2O3)_excluded	MM	GR	IF/S	MMGRIF/S
V024	Mount1 Grain475	36.3702	<0.03	20.9582	<0.03	23.0431	18.3593	0.150884	0.419015	ln(TiO2/Cr2O3)_excluded	IG	NA	IF/S	IGNAIF/S
V024	Mount1 Grain476	37.4751	0.0321905	21.8987	<0.03	34.4499	0.29989	1.85369	3.45496	all_oxides	MM	BS/GS	IF/S	MMBS/GSIF/S
V024	Mount1 Grain477	38.2268	<0.03	22.386	<0.03	32.7778	0.937215	4.62164	0.960682	ln(TiO2/Cr2O3)_excluded	MM	GR	IF/S	MMGRIF/S
V024	Mount1 Grain478	36.6466	0.0897436	21.1671	<0.03	27.056	5.32619	1.0935	8.08977	all_oxides	MM	BS/GS	IF/S	MMBS/GSIF/S
V024	Mount1 Grain479	39.1	<0.03	23.3091	0.0462656	26.1617	0.436879	10.1653	0.658155	all_oxides	MM	GR	IF/S	MMGRIF/S
V024	Mount1 Grain480	37.4436	0.0484666	21.5151	<0.03	33.7307	2.37332	2.81117	1.82639	all_oxides	MM	AM	IF/S	MMAMIF/S
V024	Mount1 Grain481	36.3669	0.0624128	22.3614	0.051258	22.8451	3.73418	1.14935	13.3007	all_oxides	MM	BS/GS	IF/S	MMBS/GSIF/S
V024	Mount1 Grain482	38.4121	<0.03	22.1903	<0.03	30.231	1.87136	6.02254	1.13696	ln(TiO2/Cr2O3)_excluded	MM	GR	IF/S	MMGRIF/S
V024	Mount1 Grain483	37.1201	0.050378	21.6814	<0.03	29.5809	2.77856	1.97065	6.02609	all_oxides	MM	AM	IF/S	MMAMIF/S
V024	Mount1 Grain484	37.4212	0.0408269	21.5921	<0.03	36.8466	0.261255	2.27228	0.682799	all_oxides	MM	AM	IF/S	MMAMIF/S
V024	Mount1 Grain485	39.3015	<0.03	22.9217	<0.03	26.9326	0.55062	9.18933	0.931566	ln(TiO2/Cr2O3)_excluded	MM	GR	IF/S	MMGRIF/S
V024	Mount1 Grain486	37.416	0.0328689	21.7131	<0.03	34.8556	0.896877	2.19931	2.44815	all_oxides	MM	AM	IF/S	MMAMIF/S
V024	Mount1 Grain487	37.1725	0.0385248	21.7034	<0.03	33.0185	1.07001	1.37709	5.12977	all_oxides	MM	BS/GS	IF/S	MMBS/GSIF/S
V024	Mount1 Grain488	38.1014	<0.03	21.2848	<0.03	31.1779	2.82905	1.86705	4.16723	ln(TiO2/Cr2O3)_excluded	MM	AM	IF/S	MMAMIF/S
V024	Mount1 Grain489	37.789	<0.03	22.1118	<0.03	32.1329	2.14271	3.77701	1.88201	ln(TiO2/Cr2O3)_excluded	MM	AM	IF/S	MMAMIF/S
V024	Mount1 Grain490	37.1158	<0.03	22.2501	<0.03	35.2681	0.709435	2.41433	1.70325	ln(TiO2/Cr2O3)_excluded	MM	AM	IF/S	MMAMIF/S
V024	Mount1 Grain491	36.675	0.0696659	21.2746	<0.03	29.6223	4.43873	0.668403	7.00693	all_oxides	MM	BS/GS	IF/S	MMBS/GSIF/S
V024	Mount1 Grain492	37.5102	0.0354485	21.8441	<0.03	29.3681	1.01598	2.49928	7.40914	all_oxides	MM	AM	M	MMAMM
V024	Mount1 Grain493	37.6363	0.0406318	21.7457	<0.03	35.8587	0.299817	2.72889	0.922251	all_oxides	MM	AM	IF/S	MMAMIF/S
V024	Mount1 Grain494	39.5943	<0.03	23.2091	<0.03	25.1651	0.51472	10.2898	1.02963	ln(TiO2/Cr2O3)_excluded	MM	GR	IF/S	MMGRIF/S
V024	Mount1 Grain495	36.023	<0.03	22.0721	9.4656e-05	19.9202	4.04064	0.212478	17.7181	all_oxides	MM	BS/GS	IF/S	MMBS/GSIF/S
V024	Mount1 Grain496	37.6105	<0.03	22.5692	<0.03	31.5756	1.4562	5.30508	1.37219	ln(TiO2/Cr2O3)_excluded	MM	GR	IF/S	MMGRIF/S
V024	Mount1 Grain497	37.0293	0.0566906	21.3775	<0.03	31.8115	1.12701	1.32669	6.88764	all_oxides	MM	BS/GS	IF/S	MMBS/GSIF/S
V092	Mount1 Grain203	37.1543	0.0862557	21.563	<0.03	28.7476	0.557823	1.52069	10.1504	all_oxides	MM	BS/GS	M	MMBS/GSM
V092	Mount1 Grain204	37.1126	0.0570326	21.1148	<0.03	28.6988	6.23012	0.87581	5.63594	all_oxides	MM	BS/GS	IF/S	MMBS/GSIF/S
V092	Mount1 Grain205	37.0111	0.0613087	21.2406	<0.03	31.8318	4.70225	1.12458	3.93955	all_oxides	MM	BS/GS	IF/S	MMBS/GSIF/S
V092	Mount1 Grain206	37.0959	0.0378307	21.4156	<0.03	35.4654	0.179797	1.74438	3.76691	all_oxides	MM	EC/UHP	IF/S	MMEC/UHPIF/S
V092	Mount1 Grain207	37.9033	0.0436176	22.5731	<0.03	32.4778	1.4299	1.80781	2.21233	all_oxides	MM	AM	IF/S	MMAMIF/S
V092	Mount1 Grain208	35.5354	0.229628	13.925	<0.03	13.2737	0.63887	0.0975204	36.2652	all_oxides	MS	NA	CS/MS	MSNACS/MS
V092	Mount1 Grain209	37.1064	0.0335203	21.4509	<0.03	34.9426	1.48588	1.4895	2.99513	all_oxides	MM	AM	IF/S	MMAMIF/S
V092	Mount1 Grain210	37.2759	0.0400574	21.4797	<0.03	36.1293	0.801106	2.06916	2.03047	all_oxides	MM	AM	IF/S	MMAMIF/S
V092	Mount1 Grain211	37.0583	0.0680566	21.5022	<0.03	31.589	0.312026	1.3787	7.62628	all_oxides	MM	BS/GS	IF/S	MMBS/GSIF/S
V092	Mount1 Grain212	36.8432	0.153532	21.1293	<0.03	28.0689	3.80294	1.56237	8.03492	all_oxides	MM	BS/GS	IF/S	MMBS/GSIF/S
V092	Mount1 Grain213	35.6311	0.346321	15.977	<0.03	10.7448	0.56328	0.0483825	36.6442	all_oxides	MS	NA	CS/MS	MSNACS/MS
V092	Mount1 Grain214	35.5115	0.184881	14.2727	<0.03	13.4326	0.665	0.0959842	35.8053	all_oxides	MS	NA	CS/MS	MSNACS/MS
V092	Mount1 Grain215	36.897	0.0625179	21.4388	<0.03	30.9225	0.867632	0.96757	8.63118	all_oxides	MM	BS/GS	IF/S	MMBS/GSIF/S
V092	Mount1 Grain216	37.4357	0.0329105	21.4854	<0.03	30.6656	0.981722	2.17886	6.96965	all_oxides	MM	AM	IF/S	MMAMIF/S
V092	Mount1 Grain217	37.284	<0.03	21.2394	<0.03	31.9369	6.13287	1.99344	1.30834	ln(TiO2/Cr2O3)_excluded	MM	AM	IF/S	MMAMIF/S
V092	Mount1 Grain218	38.3544	<0.03	21.7986	<0.03	32.2814	1.30038	4.93938	1.23325	ln(TiO2/Cr2O3)_excluded	MM	GR	IF/S	MMGRIF/S
V092	Mount1 Grain219	37.4374	<0.03	21.7605	<0.03	33.3508	2.65575	3.31664	1.29856	ln(TiO2/Cr2O3)_excluded	MM	AM	IF/S	MMAMIF/S
V092	Mount1 Grain220	36.9405	0.0332036	21.2394	<0.03	29.8712	4.11538	1.19822	6.45774	all_oxides	MM	BS/GS	IF/S	MMBS/GSIF/S
V092	Mount1 Grain221	36.3227	0.0341396	19.0458	<0.03	17.4211	22.1906	0.594585	3.85238	all_oxides	MM	BS/GS	IF/S	MMBS/GSIF/S
V092	Mount1 Grain223	37.064	0.0397518	21.3135	<0.03	33.0661	2.76033	1.36273	4.0683	all_oxides	MM	BS/GS	IF/S	MMBS/GSIF/S
V092	Mount1 Grain224	36.7708	0.0507559	21.157	<0.03	27.5478	8.34544	1.47696	4.51272	all_oxides	MM	AM	IF/S	MMAMIF/S
V092	Mount1 Grain225	37.8363	0.0357272	21.9321	<0.03	30.7233	2.34713	0.918252	5.61894	all_oxides	MM	BS/GS	IF/S	MMBS/GSIF/S
V092	Mount1 Grain226	37.3818	<0.03	21.2801	<0.03	29.9537	3.98969	2.15354	4.63151	ln(TiO2/Cr2O3)_excluded	MM	AM	IF/S	MMAMIF/S
V092	Mount1 Grain227	36.8494	0.0360641	21.6057	<0.03	35.5809	2.87273	2.27962	0.674349	all_oxides	MM	AM	IF/S	MMAMIF/S
V092	Mount1 Grain228	36.3078	0.0889044	20.5007	<0.03	24.2871	11.2283	0.914015	6.18594	all_oxides	MM	BS/GS	IF/S	MMBS/GSIF/S
V092	Mount1 Grain229	36.4515	0.0763503	21.3009	<0.03	25.7546	8.33301	1.55766	6.31057	all_oxides	MM	BS/GS	IF/S	MMBS/GSIF/S
V092	Mount1 Grain230	37.5536	0.0317305	21.5139	<0.03	35.3363	0.415412	2.19188	2.38208	all_oxides	MM	AM	IF/S	MMAMIF/S
V092	Mount1 Grain231	36.5387	0.055842	21.2888	6.67344e-05	28.5922	1.54568	0.888355	10.9789	all_oxides	MM	BS/GS	IF/S	MMBS/GSIF/S
V092	Mount1 Grain232	37.182	<0.03	21.4839	<0.03	31.9079	5.99508	2.41515	0.779978	ln(TiO2/Cr2O3)_excluded	IG	NA	IF/S	IGNAIF/S
V092	Mount1 Grain233	36.4316	0.0349804	21.4811	<0.03	36.6893	0.44947	3.05586	0.599426	all_oxides	MM	AM	IF/S	MMAMIF/S
V092	Mount1 Grain234	36.9267	<0.03	21.6542	0.0555812	31.5455	5.42366	3.39849	0.911659	all_oxides	MM	AM	IF/S	MMAMIF/S
V092	Mount1 Grain235	38.428	0.0515276	22.4441	<0.03	20.8872	0.582863	7.79817	9.35952	all_oxides	MM	EC/UHP	M	MMEC/UHPM
V092	Mount1 Grain236	37.1356	0.0403899	21.15	<0.03	37.4948	0.761987	1.88848	1.06772	all_oxides	MM	AM	IF/S	MMAMIF/S
V092	Mount1 Grain237	37.0515	0.0346834	21.5987	<0.03	35.1908	1.31758	1.6348	3.04484	all_oxides	MM	AM	IF/S	MMAMIF/S
V092	Mount1 Grain238	36.9477	0.0585827	21.4376	<0.03	30.2866	4.48236	1.44191	4.86045	all_oxides	MM	AM	IF/S	MMAMIF/S
V092	Mount1 Grain239	37.01	0.056414	21.4085	<0.03	32.6301	0.87983	1.1597	6.7461	all_oxides	MM	BS/GS	IF/S	MMBS/GSIF/S
V092	Mount1 Grain240	37.0544	0.04401	21.6145	<0.03	29.6955	1.38181	1.23701	8.84217	all_oxides	MM	BS/GS	IF/S	MMBS/GSIF/S
V092	Mount1 Grain241	36.3386	<0.03	21.0197	<0.03	26.9489	14.6958	0.248461	0.346671	ln(TiO2/Cr2O3)_excluded	IG	NA	IF/S	IGNAIF/S
V092	Mount1 Grain242	37.5699	0.0301409	21.678	<0.03	33.0826	3.15509	3.43067	0.932237	all_oxides	MM	AM	IF/S	MMAMIF/S
V092	Mount1 Grain243	38.5759	<0.03	22.872	<0.03	26.5075	0.969676	9.04254	1.95533	ln(TiO2/Cr2O3)_excluded	MM	GR	IF/S	MMGRIF/S
V092	Mount1 Grain244	37.2369	0.0348588	21.7749	<0.03	30.5237	1.25336	2.21495	6.53252	all_oxides	MM	AM	IF/S	MMAMIF/S
V092	Mount1 Grain245	37.568	<0.03	21.6733	<0.03	33.2311	1.66889	3.91683	1.81624	ln(TiO2/Cr2O3)_excluded	MM	AM	IF/S	MMAMIF/S
V092	Mount1 Grain246	37.3348	<0.03	21.4777	<0.03	36.2629	0.70181	2.1314	1.85475	ln(TiO2/Cr2O3)_excluded	MM	AM	IF/S	MMAMIF/S
V092	Mount1 Grain247	37.2701	0.0418084	21.5582	<0.03	35.7048	1.22362	1.7267	2.26816	all_oxides	MM	AM	IF/S	MMAMIF/S
V092	Mount1 Grain248	36.4437	<0.03	21.6835	<0.03	32.5635	6.45117	2.22186	0.447364	ln(TiO2/Cr2O3)_excluded	MM	AM	IF/S	MMAMIF/S
V092	Mount1 Grain249	36.9686	0.0618666	21.25	<0.03	31.966	1.32382	1.23963	6.58277	all_oxides	MM	BS/GS	IF/S	MMBS/GSIF/S
V092	Mount1 Grain250	37.3276	0.0982404	21.2811	<0.03	32.0258	1.50778	2.79954	3.83056	all_oxides	MM	AM	IF/S	MMAMIF/S
V092	Mount1 Grain251	37.1375	<0.03	21.5582	<0.03	36.1578	3.54296	1.05201	0.426534	ln(TiO2/Cr2O3)_excluded	MM	AM	IF/S	MMAMIF/S
V092	Mount1 Grain252	37.4264	<0.03	21.3851	<0.03	35.8836	1.46798	2.18351	1.18934	ln(TiO2/Cr2O3)_excluded	MM	AM	IF/S	MMAMIF/S
V092	Mount1 Grain254	37.2668	<0.03	21.6231	<0.03	34.2474	1.76408	1.85241	2.92849	ln(TiO2/Cr2O3)_excluded	MM	AM	IF/S	MMAMIF/S
V092	Mount1 Grain255	36.9951	0.0608012	21.3995	<0.03	32.4234	0.946538	1.35042	6.60616	all_oxides	MM	BS/GS	IF/S	MMBS/GSIF/S
V092	Mount1 Grain256	39.0228	<0.03	22.6193	0.0464535	27.68	0.63459	9.05323	0.836869	all_oxides	MM	GR	IF/S	MMGRIF/S
V092	Mount1 Grain257	36.8433	0.0463818	21.5151	<0.03	30.7585	1.88354	1.37614	7.03028	all_oxides	MM	BS/GS	IF/S	MMBS/GSIF/S
V092	Mount1 Grain258	37.1996	<0.03	21.6165	<0.03	31.5576	1.20056	1.95365	5.9384	ln(TiO2/Cr2O3)_excluded	MM	AM	IF/S	MMAMIF/S
V092	Mount1 Grain259	37.0091	0.0395	21.4073	<0.03	32.0898	5.08674	1.23725	2.74112	all_oxides	MM	BS/GS	IF/S	MMBS/GSIF/S
V092	Mount1 Grain260	37.3107	<0.03	21.4555	<0.03	35.3614	1.58542	2.42216	1.47995	ln(TiO2/Cr2O3)_excluded	MM	AM	IF/S	MMAMIF/S
V092	Mount1 Grain261	36.9718	0.0519866	21.6506	<0.03	34.2395	1.70564	1.24839	3.965	all_oxides	MM	BS/GS	IF/S	MMBS/GSIF/S
V092	Mount1 Grain262	36.6651	0.0607445	21.4784	<0.03	31.8402	0.813331	0.940905	7.74256	all_oxides	MM	BS/GS	IF/S	MMBS/GSIF/S
V092	Mount1 Grain263	37.2836	0.0858937	22.2665	<0.03	25.0015	1.09406	0.979981	12.8953	all_oxides	MM	BS/GS	IF/S	MMBS/GSIF/S
V092	Mount1 Grain264	37.4298	0.0332598	21.6441	0.0338739	30.4155	1.27742	1.96854	6.96149	all_oxides	MM	AM	IF/S	MMAMIF/S
V092	Mount1 Grain265	38.2936	<0.03	22.5772	<0.03	29.3457	0.734332	8.00408	0.911081	ln(TiO2/Cr2O3)_excluded	MM	GR	IF/S	MMGRIF/S
V092	Mount1 Grain266	37.4613	0.0400026	21.598	<0.03	31.0736	0.781694	1.53201	7.19412	all_oxides	MM	BS/GS	IF/S	MMBS/GSIF/S
V092	Mount1 Grain267	36.6837	<0.03	21.438	<0.03	31.8827	7.75132	1.47805	0.618553	ln(TiO2/Cr2O3)_excluded	MM	AM	IF/S	MMAMIF/S
V092	Mount1 Grain268	35.8548	<0.03	20.3198	<0.03	23.4355	17.2192	0.504138	1.88623	ln(TiO2/Cr2O3)_excluded	IG	NA	IF/S	IGNAIF/S
V092	Mount1 Grain269	37.055	0.0447189	21.5482	<0.03	36.9901	0.625281	2.34851	0.870189	all_oxides	MM	AM	IF/S	MMAMIF/S
V092	Mount1 Grain270	36.5881	0.0527372	21.69	<0.03	36.425	1.22832	1.55312	1.97837	all_oxides	MM	AM	IF/S	MMAMIF/S
V092	Mount1 Grain271	36.3585	0.046351	21.5468	<0.03	34.2091	2.18605	1.36107	4.15499	all_oxides	MM	BS/GS	IF/S	MMBS/GSIF/S
V092	Mount1 Grain272	36.7649	<0.03	21.7101	<0.03	32.7231	4.68568	2.60647	1.38678	ln(TiO2/Cr2O3)_excluded	MM	AM	IF/S	MMAMIF/S
V092	Mount1 Grain273	37.193	<0.03	21.9951	<0.03	32.043	1.27338	3.27884	3.91999	ln(TiO2/Cr2O3)_excluded	MM	AM	IF/S	MMAMIF/S
V092	Mount1 Grain274	37.811	0.235432	20.9458	<0.03	26.0635	1.03208	2.65952	10.0033	all_oxides	MM	EC/UHP	M	MMEC/UHPM
V092	Mount1 Grain275	37.1922	0.0533215	21.3037	4.02756e-05	31.8931	0.780292	1.34212	7.16905	all_oxides	MM	BS/GS	IF/S	MMBS/GSIF/S
V092	Mount1 Grain276	36.8649	<0.03	21.427	<0.03	30.9976	6.82609	2.11083	1.64138	ln(TiO2/Cr2O3)_excluded	MM	AM	IF/S	MMAMIF/S
V092	Mount1 Grain277	37.8336	<0.03	22.1574	<0.03	29.0264	1.7133	6.3332	2.78389	ln(TiO2/Cr2O3)_excluded	MM	AM	IF/S	MMAMIF/S
V092	Mount1 Grain278	37.4752	0.083053	21.5425	<0.03	30.8305	0.201989	2.33611	6.86206	all_oxides	MM	EC/UHP	IF/S	MMEC/UHPIF/S
V092	Mount1 Grain279	36.8133	<0.03	21.5297	<0.03	30.7269	7.02671	2.58265	1.15521	ln(TiO2/Cr2O3)_excluded	MM	AM	IF/S	MMAMIF/S
V092	Mount1 Grain280	38.9149	0.0634225	20.6067	<0.03	27.8961	8.8241	2.37714	1.18634	all_oxides	MM	AM	IF/S	MMAMIF/S
V092	Mount1 Grain281	37.0625	<0.03	21.6504	<0.03	31.8629	2.56401	3.15744	3.23805	ln(TiO2/Cr2O3)_excluded	MM	AM	IF/S	MMAMIF/S
V092	Mount1 Grain282	36.7302	0.0513049	21.2185	<0.03	32.5402	3.8318	1.10954	4.17946	all_oxides	MM	BS/GS	IF/S	MMBS/GSIF/S
V092	Mount1 Grain283	36.9417	0.0582673	21.7068	<0.03	34.4932	0.335351	1.95869	4.14919	all_oxides	MM	BS/GS	IF/S	MMBS/GSIF/S
V092	Mount1 Grain284	38.489	<0.03	22.4686	<0.03	29.8145	0.436073	7.67834	1.01815	ln(TiO2/Cr2O3)_excluded	MM	GR	IF/S	MMGRIF/S
V092	Mount1 Grain285	36.8029	0.050572	21.4762	<0.03	28.5798	2.97165	1.1972	8.17377	all_oxides	MM	BS/GS	IF/S	MMBS/GSIF/S
V092	Mount1 Grain286	36.5725	0.0819731	21.6626	<0.03	31.0511	1.84216	1.35495	7.24706	all_oxides	MM	BS/GS	IF/S	MMBS/GSIF/S
V092	Mount1 Grain287	36.6606	0.0418612	21.5287	<0.03	34.7973	2.44145	2.77187	1.40365	all_oxides	IG	NA	IF/S	IGNAIF/S
V092	Mount1 Grain289	36.3956	0.0457039	21.2589	<0.03	28.2697	4.91092	0.710614	8.12008	all_oxides	MM	BS/GS	IF/S	MMBS/GSIF/S
V092	Mount1 Grain290	37.0471	0.0450522	21.651	<0.03	31.2378	0.813168	1.71677	7.17632	all_oxides	MM	BS/GS	IF/S	MMBS/GSIF/S
V092	Mount1 Grain291	36.8962	0.046192	21.5073	<0.03	34.0936	2.05965	1.41717	3.7539	all_oxides	MM	BS/GS	IF/S	MMBS/GSIF/S
V092	Mount1 Grain292	36.943	0.0538946	20.9845	<0.03	28.7018	6.9631	1.62399	4.43279	all_oxides	MM	AM	IF/S	MMAMIF/S
V092	Mount1 Grain293	37.3499	<0.03	21.8656	<0.03	34.2407	1.34268	3.89104	1.18133	ln(TiO2/Cr2O3)_excluded	MM	AM	IF/S	MMAMIF/S
V092	Mount1 Grain294	36.6141	<0.03	21.2919	<0.03	33.1885	1.8005	1.23275	4.83542	ln(TiO2/Cr2O3)_excluded	MM	BS/GS	IF/S	MMBS/GSIF/S
V092	Mount1 Grain295	36.4116	0.100324	21.3433	<0.03	32.28	1.75883	1.11964	6.8506	all_oxides	MM	BS/GS	IF/S	MMBS/GSIF/S
V092	Mount1 Grain296	37.7601	0.085199	20.7496	<0.03	26.6976	5.68468	1.02448	7.59591	all_oxides	MM	BS/GS	IF/S	MMBS/GSIF/S
V092	Mount1 Grain297	36.5784	0.0357863	21.6308	<0.03	36.0746	0.827417	1.04974	3.5117	all_oxides	MM	BS/GS	IF/S	MMBS/GSIF/S
V092	Mount1 Grain298	37.0972	<0.03	21.7066	<0.03	32.2643	1.64865	3.92962	2.99123	ln(TiO2/Cr2O3)_excluded	MM	AM	IF/S	MMAMIF/S
V092	Mount1 Grain299	36.3767	0.0583732	21.6216	<0.03	30.2009	2.54548	1.69508	7.01048	all_oxides	MM	AM	IF/S	MMAMIF/S
V092	Mount1 Grain300	38.2676	0.0307911	21.7071	<0.03	31.1255	2.10998	5.10715	1.53165	all_oxides	MM	AM	IF/S	MMAMIF/S
V092	Mount1 Grain301	37.3235	<0.03	21.7937	<0.03	34.2398	0.784621	3.17271	2.3246	ln(TiO2/Cr2O3)_excluded	MM	AM	IF/S	MMAMIF/S
V092	Mount1 Grain302	35.6482	0.08519	20.9707	<0.03	21.9178	19.4478	1.07076	0.703097	all_oxides	IG	NA	IF/S	IGNAIF/S
V092	Mount1 Grain303	37.007	<0.03	21.5246	<0.03	33.9132	1.32168	2.06967	3.54851	ln(TiO2/Cr2O3)_excluded	MM	AM	IF/S	MMAMIF/S
V092	Mount1 Grain304	36.5882	0.0333168	21.64	<0.03	29.7036	0.949085	1.02311	9.81019	all_oxides	MM	BS/GS	IF/S	MMBS/GSIF/S
V203	Mount2 Grain220	37.8426	0.0315626	21.4685	7.40545e-05	31.7737	6.84225	1.38103	0.346146	all_oxides	IG	NA	IF/S	IGNAIF/S
V203	Mount2 Grain221	38.1217	0.0311864	21.1386	<0.03	34.6792	0.614317	2.31216	2.51006	all_oxides	MM	AM	IF/S	MMAMIF/S
V203	Mount2 Grain222	39.9073	0.0419565	22.3806	<0.03	26.3451	0.671906	9.94254	0.50364	all_oxides	MM	GR	IF/S	MMGRIF/S
V203	Mount2 Grain223	36.1278	0.0486866	21.1156	<0.03	34.0657	3.05372	1.66161	3.69752	all_oxides	MM	AM	IF/S	MMAMIF/S
V203	Mount2 Grain224	37.5347	<0.03	21.589	<0.03	34.536	0.648544	3.17345	2.25587	ln(TiO2/Cr2O3)_excluded	MM	GR	IF/S	MMGRIF/S
V203	Mount2 Grain225	35.4227	<0.03	22.0588	<0.03	28.0408	13.0967	0.171213	0.777192	ln(TiO2/Cr2O3)_excluded	IG	NA	IF/S	IGNAIF/S
V203	Mount2 Grain226	37.7453	0.150057	21.1262	<0.03	29.8315	1.53174	1.22513	8.09928	all_oxides	MM	BS/GS	M	MMBS/GSM
V203	Mount2 Grain227	37.5371	<0.03	21.3127	<0.03	32.8543	5.79798	1.66513	0.640497	ln(TiO2/Cr2O3)_excluded	MM	AM	IF/S	MMAMIF/S
V203	Mount2 Grain228	38.0516	0.0415521	20.7082	<0.03	34.2224	2.13871	2.43321	1.89196	all_oxides	MM	AM	IF/S	MMAMIF/S
V203	Mount2 Grain229	37.6384	0.0525678	21.0607	<0.03	35.6923	1.18576	1.87823	2.2549	all_oxides	MM	AM	IF/S	MMAMIF/S
V203	Mount2 Grain230	37.5755	0.0844802	21.269	<0.03	33.669	0.614455	2.18771	4.30785	all_oxides	MM	BS/GS	IF/S	MMBS/GSIF/S
V203	Mount2 Grain231	36.998	0.342457	20.7897	<0.03	32.3975	3.98276	1.29796	3.75414	all_oxides	MM	BS/GS	IF/S	MMBS/GSIF/S
V203	Mount2 Grain232	38.2584	<0.03	20.8609	<0.03	29.82	5.55968	2.32509	3.00693	ln(TiO2/Cr2O3)_excluded	MM	AM	IF/S	MMAMIF/S
V203	Mount2 Grain233	39.9201	0.0897252	20.2545	<0.03	27.2626	2.97193	0.815422	8.41388	all_oxides	MM	BS/GS	IF/S	MMBS/GSIF/S
V203	Mount2 Grain234	36.9713	<0.03	21.3338	<0.03	34.9244	2.46094	2.73217	1.45778	ln(TiO2/Cr2O3)_excluded	MM	AM	IF/S	MMAMIF/S
V203	Mount2 Grain236	38.3292	0.229153	20.7045	4.42325e-05	24.7721	5.45537	0.469868	9.90269	all_oxides	MM	BS/GS	IF/S	MMBS/GSIF/S
V203	Mount2 Grain237	35.5547	2.38807	19.9705	<0.03	28.7536	3.09726	0.34999	8.64059	all_oxides	MM	BS/GS	M	MMBS/GSM
V203	Mount2 Grain238	36.9126	0.119652	21.4456	<0.03	30.7371	0.952426	3.47907	6.08874	all_oxides	MM	AM	IF/S	MMAMIF/S
V203	Mount2 Grain239	40.0149	0.0346424	22.6003	<0.03	25.4268	0.232186	10.9223	0.510887	all_oxides	MM	GR	IF/S	MMGRIF/S
V203	Mount2 Grain240	38.3148	<0.03	21.6403	<0.03	32.1604	2.93235	3.69598	1.16857	ln(TiO2/Cr2O3)_excluded	MM	AM	IF/S	MMAMIF/S
V203	Mount2 Grain241	37.6905	<0.03	21.1296	<0.03	32.9768	5.8953	1.52737	0.619926	ln(TiO2/Cr2O3)_excluded	MM	AM	IF/S	MMAMIF/S
V203	Mount2 Grain242	38.3596	0.0823283	21.6747	<0.03	28.3443	0.835991	5.14661	4.9493	all_oxides	MM	EC/UHP	M	MMEC/UHPM
V203	Mount2 Grain243	37.0233	0.141344	20.9555	<0.03	24.2845	10.633	1.62232	5.07591	all_oxides	MM	BS/GS	IF/S	MMBS/GSIF/S
V203	Mount2 Grain244	36.0672	0.156912	21.4909	<0.03	30.1143	1.38449	0.678685	9.06132	all_oxides	MM	BS/GS	M	MMBS/GSM
V203	Mount2 Grain245	37.4803	0.0508533	21.3585	<0.03	35.4604	0.604421	2.09488	2.66388	all_oxides	MM	AM	IF/S	MMAMIF/S
V203	Mount2 Grain246	37.7931	0.0944294	20.8801	<0.03	33.6627	1.91376	1.20246	4.19054	all_oxides	MM	BS/GS	IF/S	MMBS/GSIF/S
V203	Mount2 Grain247	38.1176	<0.03	21.8387	<0.03	32.4531	1.82041	4.6776	0.900272	ln(TiO2/Cr2O3)_excluded	MM	GR	IF/S	MMGRIF/S
V203	Mount2 Grain248	35.9726	0.115719	21.4241	<0.03	32.6776	4.23355	2.42553	2.76192	all_oxides	MM	AM	IF/S	MMAMIF/S
V203	Mount2 Grain249	37.4897	0.161183	20.9692	<0.03	29.615	2.30906	0.658137	8.45425	all_oxides	MM	BS/GS	M	MMBS/GSM
V203	Mount2 Grain250	39.0786	<0.03	21.0119	<0.03	32.0635	3.00871	2.23648	2.4777	ln(TiO2/Cr2O3)_excluded	MM	AM	IF/S	MMAMIF/S
V203	Mount2 Grain251	38.0598	0.0312078	21.5724	<0.03	34.0102	0.786474	3.38876	1.91836	all_oxides	MM	AM	IF/S	MMAMIF/S
V203	Mount2 Grain252	36.5859	0.101906	21.64	<0.03	33.5485	0.525009	3.71323	3.36311	all_oxides	MM	AM	IF/S	MMAMIF/S
V203	Mount2 Grain253	37.9743	0.0920381	21.1918	<0.03	29.3354	4.22138	2.77099	4.13027	all_oxides	MM	AM	IF/S	MMAMIF/S
V203	Mount2 Grain254	34.8126	0.137339	22.4195	<0.03	30.921	1.16207	0.697857	9.31296	all_oxides	MM	BS/GS	M	MMBS/GSM
V203	Mount2 Grain256	40.0158	<0.03	21.2696	<0.03	30.175	1.72141	5.6896	0.808238	ln(TiO2/Cr2O3)_excluded	MM	GR	IF/S	MMGRIF/S
V203	Mount2 Grain257	36.276	0.0534925	22.7021	<0.03	30.1811	0.725631	7.47884	1.8379	all_oxides	MM	GR	IF/S	MMGRIF/S
V203	Mount2 Grain259	67.0129	0.33344	11.9213	<0.03	13.2284	0.51975	4.53374	1.33423	all_oxides	IG	NA	IF/S	IGNAIF/S
V203	Mount2 Grain260	37.3408	0.0512907	21.6772	<0.03	30.9623	4.32932	2.84212	2.69042	all_oxides	MM	AM	IF/S	MMAMIF/S
V203	Mount2 Grain261	34.9686	0.235604	21.7301	<0.03	28.5234	2.99469	1.73965	9.11773	all_oxides	MM	AM	M	MMAMM
V203	Mount2 Grain262	34.6313	0.0488328	22.7577	<0.03	31.6943	0.62852	2.14429	6.97367	all_oxides	MM	BS/GS	IF/S	MMBS/GSIF/S
V203	Mount2 Grain263	36.0123	0.0680453	21.8299	<0.03	26.8911	4.76945	2.25109	7.47143	all_oxides	MM	BS/GS	M	MMBS/GSM
V203	Mount2 Grain264	37.8333	0.178326	20.7655	<0.03	25.8633	7.44789	0.51988	6.84668	all_oxides	MM	BS/GS	IF/S	MMBS/GSIF/S
V203	Mount2 Grain265	45.2213	0.175612	18.4391	<0.03	25.8517	1.54457	0.85378	7.57458	all_oxides	MM	BS/GS	M	MMBS/GSM
V203	Mount2 Grain266	35.228	0.0312367	22.1334	<0.03	33.4199	2.17629	2.03645	4.4869	all_oxides	MM	AM	IF/S	MMAMIF/S
V203	Mount2 Grain267	37.4185	0.0771273	20.8182	<0.03	30.3829	2.22015	1.04005	7.36324	all_oxides	MM	BS/GS	IF/S	MMBS/GSIF/S
V203	Mount2 Grain268	36.1459	0.188591	21.9647	<0.03	24.4517	1.11581	0.455904	15.6074	all_oxides	MM	BS/GS	IF/S	MMBS/GSIF/S
V203	Mount2 Grain269	35.5425	0.137617	21.2506	<0.03	33.0292	3.83118	1.4125	4.01595	all_oxides	MM	BS/GS	IF/S	MMBS/GSIF/S
V203	Mount2 Grain271	35.9542	0.0959237	21.3295	<0.03	31.8396	3.23783	1.13785	5.3413	all_oxides	MM	BS/GS	IF/S	MMBS/GSIF/S
V203	Mount2 Grain272	35.1798	<0.03	22.3365	<0.03	36.5916	1.3681	2.59473	1.35313	ln(TiO2/Cr2O3)_excluded	MM	AM	IF/S	MMAMIF/S
V203	Mount2 Grain273	36.8702	<0.03	20.9968	<0.03	34.2032	0.635822	1.7621	4.89676	ln(TiO2/Cr2O3)_excluded	MM	BS/GS	IF/S	MMBS/GSIF/S
V203	Mount2 Grain275	37.4957	0.0475585	20.9827	<0.03	36.3819	1.62828	2.28303	1.01419	all_oxides	IG	NA	IF/S	IGNAIF/S
V203	Mount2 Grain276	37.1155	<0.03	21.6646	<0.03	33.0842	3.48448	3.31954	1.07952	ln(TiO2/Cr2O3)_excluded	MM	AM	IF/S	MMAMIF/S
V203	Mount2 Grain277	37.9548	0.0838791	20.7016	<0.03	35.9924	0.291393	2.13017	2.34045	all_oxides	MM	AM	IF/S	MMAMIF/S
V203	Mount2 Grain278	37.1258	0.0843382	20.4552	5.63904e-05	13.7124	14.7264	0.16818	13.7158	all_oxides	MM	EC/UHP	IF/S	MMEC/UHPIF/S
V203	Mount2 Grain279	35.9752	0.0958338	21.1196	<0.03	34.9843	2.1618	1.35977	3.89454	all_oxides	MM	BS/GS	IF/S	MMBS/GSIF/S
V203	Mount2 Grain280	36.4196	0.0972333	20.9814	<0.03	34.6499	2.12391	1.20344	4.23339	all_oxides	MM	BS/GS	IF/S	MMBS/GSIF/S
V203	Mount2 Grain281	36.8026	0.143808	21.3676	<0.03	25.9984	2.87055	1.6624	10.9376	all_oxides	MM	BS/GS	M	MMBS/GSM
V203	Mount2 Grain282	37.9074	0.169141	20.6831	<0.03	29.827	3.27037	1.07933	6.74576	all_oxides	MM	BS/GS	IF/S	MMBS/GSIF/S
V203	Mount2 Grain283	34.9755	0.182171	21.7691	<0.03	28.5183	3.22566	0.98319	9.85503	all_oxides	MM	BS/GS	M	MMBS/GSM
V203	Mount2 Grain284	35.6848	0.0773857	21.5612	<0.03	31.0687	1.87793	0.649447	8.30316	all_oxides	MM	BS/GS	IF/S	MMBS/GSIF/S
V203	Mount2 Grain285	37.6842	0.0700533	21.1241	<0.03	35.1796	0.661584	1.8542	3.16157	all_oxides	MM	BS/GS	IF/S	MMBS/GSIF/S
V203	Mount2 Grain287	36.4241	0.131984	21.1973	<0.03	36.275	0.445035	1.18122	3.7595	all_oxides	MM	BS/GS	IF/S	MMBS/GSIF/S
V203	Mount2 Grain288	36.6924	0.219223	20.9272	<0.03	26.7853	7.70806	0.793621	5.98844	all_oxides	MM	BS/GS	IF/S	MMBS/GSIF/S
V203	Mount2 Grain289	33.2371	<0.03	22.1384	<0.03	29.2873	3.37012	0.638605	10.8776	ln(TiO2/Cr2O3)_excluded	MM	BS/GS	IF/S	MMBS/GSIF/S
V203	Mount2 Grain292	35.6213	0.0516436	21.1099	<0.03	36.3385	1.41003	2.07886	2.75196	all_oxides	MM	AM	IF/S	MMAMIF/S
V203	Mount2 Grain296	37.0695	0.106334	21.5249	<0.03	27.0314	1.51266	1.28514	11.4717	all_oxides	MM	BS/GS	M	MMBS/GSM
V203	Mount2 Grain297	36.5377	0.103005	21.2507	<0.03	36.6551	0.267088	1.50644	3.51268	all_oxides	MM	BS/GS	IF/S	MMBS/GSIF/S
V203	Mount2 Grain298	35.6582	<0.03	22	<0.03	32.1047	5.92999	2.9637	1.09698	ln(TiO2/Cr2O3)_excluded	MM	AM	IF/S	MMAMIF/S
V203	Mount2 Grain299	35.7669	0.123758	19.1008	<0.03	31.9872	0.68346	2.04273	9.6089	all_oxides	MM	EC/UHP	IF/S	MMEC/UHPIF/S
V203	Mount2 Grain300	34.5763	<0.03	21.3804	<0.03	31.7047	10.9961	0.350038	0.526556	ln(TiO2/Cr2O3)_excluded	IG	NA	IF/S	IGNAIF/S
V203	Mount2 Grain301	35.3392	0.0518669	21.9327	<0.03	34.5069	0.784273	2.74284	4.2614	all_oxides	MM	AM	IF/S	MMAMIF/S
V203	Mount2 Grain302	38.3361	0.111507	20.6542	<0.03	32.8966	2.11814	1.56993	3.96836	all_oxides	MM	AM	IF/S	MMAMIF/S
V203	Mount2 Grain304	36.1674	0.0789988	21.3946	<0.03	33.7362	2.82565	2.27878	3.29036	all_oxides	MM	AM	IF/S	MMAMIF/S
V203	Mount2 Grain305	37.3847	0.0390203	20.6663	5.50329e-05	29.1739	11.1836	0.839155	0.351975	all_oxides	IG	NA	IF/S	IGNAIF/S
V203	Mount2 Grain306	36.459	0.203464	21.3361	<0.03	15.3198	1.92623	0.0779835	24.4585	all_oxides	MS	NA	CS/MS	MSNACS/MS
V203	Mount2 Grain309	36.0117	0.0951781	22.0878	<0.03	33.5785	0.724984	3.79553	3.01924	all_oxides	IG	NA	IF/S	IGNAIF/S
