# Supplementary material for: Two glaciers and one sedimentary sink: the competing role of the Aare and the Valais glaciers in filling an overdeepened trough inferred from provenance analysis
Source: Copernicus journal article supplement (doi:10.5194/egqsj-71-163-2022), 2022-09-01
Supplement: Supplementary file 1 [file egqsj-71-163-2022-supplement.zip › Supplement/Supplementary_PetroChemistry.xlsx]

## Sheet: VAN20002238_1
	Method	LF300	LF300	LF300	LF300	LF300	LF300	LF300	LF300	LF300	LF300	LF300	LF300	LF300	LF300	LF300	LF300	LF300	LF300	LF300	LF300
	Analyte	SiO2	Al2O3	Fe2O3	MgO	CaO	Na2O	K2O	TiO2	P2O5	MnO	Cr2O3	Ba	Ni	Sr	Zr	Y	Nb	Sc	LOI	Sum
	Unit	%	%	%	%	%	%	%	%	%	%	%	PPM	PPM	PPM	PPM	PPM	PPM	PPM	%	%
	MDL	0.01	0.01	0.04	0.01	0.01	0.01	0.01	0.01	0.01	0.01	0.002	5	20	2	5	3	5	1	-5.1	0.01
Sample	Type
V 008.01	Sediment Pulp	41.83	9.41	3.76	2.89	19.12	0.86	1.88	0.45	0.12	0.08	0.014	242	46	350	120	22	8	9	19.4	99.87
V 013.01	Sediment Pulp	45.21	8.69	3.36	2.82	18.29	1.01	1.71	0.42	0.13	0.08	0.012	231	42	335	142	21	12	9	18.1	99.95
V 018.01	Sediment Pulp	40.23	8.86	3.39	2.74	21.02	0.74	1.75	0.42	0.12	0.07	0.012	238	49	387	107	18	5	9	20.5	99.94
V 024.01	Sediment Pulp	42.03	7.81	3.14	2.72	21.09	1.15	1.62	0.34	0.14	0.09	0.011	255	46	376	132	20	7	7	19.7	99.95
V 029.01	Sediment Pulp	44.68	9.22	3.53	2.82	18.01	1.05	1.87	0.45	0.13	0.08	0.015	260	40	334	189	22	8	9	18	99.95
V 031.01	Sediment Pulp	41.92	6.9	2.68	2.08	22.73	0.67	1.34	0.36	0.11	0.06	0.009	180	23	483	156	16	9	7	21	99.95
V 042.01	Sediment Pulp	47.91	8.99	3.52	2.88	16.3	1.18	1.84	0.46	0.15	0.08	0.015	267	35	304	240	23	11	9	16.5	99.96
V 047.01	Sediment Pulp	51.68	7.73	2.91	2.72	15.83	1.43	1.56	0.43	0.16	0.08	0.018	226	38	279	274	22	5	7	15.3	99.95
V 052.01	Sediment Pulp	49.28	9.07	3.51	2.89	15.48	1.26	1.77	0.5	0.16	0.08	0.017	275	37	293	327	26	9	9	15.8	99.95
V 057.01	Sediment Pulp	51.86	8.27	3.14	2.75	15.03	1.43	1.6	0.41	0.15	0.08	0.013	241	41	265	239	23	8	8	15.1	99.94
V 062.01	Sediment Pulp	46.83	9.56	3.75	3.01	16	1.1	1.92	0.46	0.14	0.08	0.015	262	39	286	178	22	10	9	17	99.95
V 067.01	Sediment Pulp	39.8	9.23	3.75	2.87	20.43	0.72	1.83	0.46	0.13	0.08	0.014	216	49	348	136	21	8	9	20.5	99.92
V 072.01	Sediment Pulp	42.49	10.02	3.89	2.96	18	0.82	1.99	0.49	0.13	0.08	0.014	248	46	324	134	22	8	10	19	99.93
V 077.01	Sediment Pulp	50.65	8.04	3.16	2.86	15.69	1.32	1.58	0.45	0.16	0.08	0.015	243	40	287	256	25	10	8	15.9	99.95
V 082.01	Sediment Pulp	48.3	8.9	3.41	2.88	16.3	1.23	1.78	0.44	0.14	0.08	0.013	241	40	289	163	22	6	8	16.4	99.95
V 087.01	Sediment Pulp	56.19	9.35	2.91	2.25	12.26	1.92	1.98	0.54	0.17	0.09	0.013	264	32	223	446	28	13	8	12.2	99.95
V 092.01	Sediment Pulp	55.89	9.71	3	2.37	12.05	1.84	2.09	0.46	0.16	0.09	0.01	253	34	214	241	24	9	8	12.2	99.94
V 097.01	Sediment Pulp	55.02	6.73	2.16	2.21	15.73	1.42	1.38	0.36	0.13	0.07	0.013	192	23	295	210	20	7	6	14.6	99.96
V 103.01	Sediment Pulp	47.23	8.76	3.25	2.75	17.37	1.2	1.79	0.44	0.15	0.08	0.01	246	39	320	171	23	19	8	16.8	99.95
V 109.01	Sediment Pulp	42.1	5.9	2.83	2.34	23.31	0.77	1.09	0.47	0.13	0.07	0.012	360	27	464	529	25	<5	7	20.8	99.96
V 113.01	Sediment Pulp	44.35	5.6	2.27	2.28	22.46	0.8	1.03	0.32	0.1	0.06	0.008	180	24	467	182	17	8	6	20.6	99.97
V 118.01	Sediment Pulp	41.01	6.83	2.76	2.33	22.89	0.7	1.29	0.39	0.11	0.06	0.009	199	34	461	182	17	7	7	21.5	99.97
V 122.01	Sediment Pulp	40.36	7.24	2.83	2.38	22.95	0.64	1.39	0.36	0.1	0.06	0.009	209	34	455	117	16	13	7	21.5	99.95
V 128.01	Sediment Pulp	47.35	5.18	2.09	2.16	21.27	0.9	0.95	0.28	0.1	0.06	0.006	156	23	424	133	15	9	5	19.5	99.97
V 138.01	Sediment Pulp	46.45	5.9	2.27	2.2	21.16	0.88	1.12	0.32	0.1	0.06	0.008	193	22	417	178	16	12	5	19.4	99.95
V 143.01	Sediment Pulp	41.82	6.94	2.78	2.31	22.43	0.69	1.31	0.38	0.1	0.06	0.009	175	25	448	223	18	12	7	21	99.95
V 148.01	Sediment Pulp	51.29	5.89	2.08	2.13	18.53	1.2	1.16	0.34	0.12	0.07	0.012	189	21	343	353	19	10	5	17	99.96
V 153.01	Sediment Pulp	49.19	5.64	2.12	2.19	19.91	1.06	1.07	0.3	0.11	0.06	0.008	216	26	376	165	16	9	5	18.2	99.96
V 158.01	Sediment Pulp	44.54	6.27	2.44	2.23	21.78	0.8	1.18	0.36	0.1	0.06	0.008	171	25	425	207	17	13	6	20.1	99.97
V 163.01	Sediment Pulp	42.42	6.61	2.61	2.22	22.43	0.71	1.25	0.36	0.11	0.06	0.008	241	24	439	213	16	12	7	21.1	99.96
V 168.01	Sediment Pulp	39.98	8.6	3.31	2.47	21.68	0.58	1.64	0.41	0.1	0.07	0.012	236	39	400	146	17	12	8	21	99.95
V 173.01	Sediment Pulp	51	5.78	2.31	2.13	18.63	1.16	1.11	0.36	0.12	0.06	0.009	256	25	367	401	21	11	5	17.2	99.95
V 178.01	Sediment Pulp	45.8	5.19	2.24	2.08	22.13	0.82	0.92	0.33	0.1	0.06	0.01	212	22	440	296	16	8	5	20.2	99.96
V 184.01	Sediment Pulp	47.06	4.96	2.06	2.08	21.79	0.85	0.92	0.35	0.1	0.06	0.008	190	<20	432	318	19	14	5	19.6	99.97
V 188.01	Sediment Pulp	43.78	6.43	2.63	2.27	21.88	0.78	1.18	0.35	0.11	0.06	0.009	223	25	426	192	17	16	6	20.4	99.96
V 193.01	Sediment Pulp	45.39	6.43	2.5	2.24	21.03	0.87	1.23	0.36	0.11	0.06	0.009	197	21	408	206	18	10	6	19.6	99.95
V 198.01	Sediment Pulp	41.47	6.98	2.86	2.46	22.29	0.8	1.31	0.41	0.1	0.07	0.012	221	29	440	279	19	13	7	21.1	99.97
V 203.01	Sediment Pulp	45.06	7.48	2.98	2.42	19.97	0.93	1.46	0.42	0.12	0.07	0.011	204	23	389	256	20	14	7	18.9	99.95
V 208.01	Sediment Pulp	50.56	13.65	5.04	3.31	9.77	1.37	2.77	0.62	0.16	0.1	0.013	338	38	178	221	26	16	13	12.5	99.94
V GAD1	Sediment Pulp	40.6	11.57	4.98	1.99	16.56	1.26	2.29	0.69	0.27	0.09	0.009	454	40	199	680	44	19	12	19.4	99.93
V LUE1	Sediment Pulp	46.78	12	5.58	1.47	13.88	0.57	1.85	0.72	0.17	0.09	0.014	268	46	221	377	28	21	13	16.7	99.92
V SIM1	Sediment Pulp	38.55	8.08	3.33	2.5	21.53	0.53	1.55	0.42	0.12	0.08	0.017	240	52	455	197	16	17	8	23.1	99.95
V Aa1.1	Sediment Pulp	59.11	15.66	7.9	3.29	2.22	2.03	3.38	0.99	0.29	0.12	0.016	688	49	181	704	41	25	19	4.7	99.91
V KAN1	Sediment Pulp	37.17	6.99	2.76	1.61	25.46	0.44	1.35	0.36	0.09	0.04	0.008	183	21	729	188	14	11	6	23.5	99.95
V Aa2.1	Sediment Pulp	52.72	12.45	6.14	2.25	9.73	1.92	2.66	0.94	0.66	0.1	0.011	576	47	204	5590	127	24	19	9.5	99.95
V Aa3.1	Sediment Pulp	46.51	7.95	3.04	1.74	17.51	0.96	1.49	0.44	0.17	0.09	0.013	267	41	357	410	26	11	7	19.9	99.94
V SEN1	Sediment Pulp	49.98	7.44	2.87	1.71	16.06	1.04	1.39	0.42	0.15	0.07	0.015	247	48	334	361	21	9	7	18.7	99.95
V SAN1	Sediment Pulp	31.61	6.84	2.69	1.71	27.22	0.33	1.27	0.33	0.13	0.09	0.018	188	88	494	129	16	9	6	27.6	99.92
C 012.01	Sediment Pulp	50.01	7.78	3.02	2.82	16.58	1.35	1.52	0.44	0.15	0.08	0.019	355	43	306	331	23	16	7	16.1	99.96
C 024.01	Sediment Pulp	43.02	7.57	3.23	3.02	20.3	1.25	1.54	0.36	0.15	0.09	0.015	263	46	339	233	21	11	8	19.3	99.96
C 026.01	Sediment Pulp	45.38	7.72	3.03	2.95	19.14	1.37	1.54	0.35	0.13	0.09	0.015	238	39	316	172	20	8	7	18.1	99.96
C 031.01	Sediment Pulp	44.28	9.14	3.64	2.96	18.15	1.16	1.83	0.4	0.13	0.08	0.015	265	51	324	144	20	8	9	18.1	99.95
C 034.01	Sediment Pulp	45.7	8.31	3.17	2.78	18.45	1.15	1.63	0.46	0.14	0.08	0.017	233	44	332	321	22	9	8	18	99.96
C 044.01	Sediment Pulp	46.92	8.38	3.27	2.89	17.56	1.27	1.63	0.42	0.15	0.08	0.014	243	44	302	251	22	8	8	17.3	99.96
C 078.01	Sediment Pulp	52.9	8.71	3.12	2.8	14.1	1.62	1.74	0.49	0.18	0.09	0.018	272	36	251	371	27	13	9	14.1	99.96
C 110.01	Sediment Pulp	45.6	5.89	2.84	2.49	20.79	1.02	1.07	0.39	0.13	0.07	0.014	302	34	411	497	24	7	7	19.5	99.96
C 123.01	Sediment Pulp	47.05	4.71	2.09	2.12	21.76	0.93	0.86	0.31	0.11	0.06	0.009	216	<20	462	290	16	9	5	19.8	99.96
C 150.01	Sediment Pulp	44.3	8.18	3.18	2.43	19.45	1.12	1.63	0.35	0.11	0.08	0.013	339	51	365	172	18	7	8	19	99.93
C 157.01	Sediment Pulp	42.46	7.26	2.83	2.29	21.55	0.85	1.37	0.35	0.11	0.06	0.011	279	40	410	203	17	9	7	20.7	99.96
C 179.01	Sediment Pulp	48.2	5.98	2.51	2.05	19.96	1.1	1.15	0.36	0.12	0.06	0.012	418	35	394	456	20	10	6	18.3	99.97
C 197.01	Sediment Pulp	47.98	5.58	2.4	1.82	20.71	1.04	1.11	0.26	0.09	0.06	0.011	390	30	403	194	15	9	5	18.8	99.95
Pulp Duplicates
V 109.01	Sediment Pulp	42.1	5.9	2.83	2.34	23.31	0.77	1.09	0.47	0.13	0.07	0.012	360	27	464	529	25	<5	7	20.8	99.96
V 109.01	REP	42.4	5.83	2.79	2.3	23.24	0.75	1.05	0.47	0.12	0.07	0.013	343	34	455	507	25	10	7	20.8	99.96
C 024.01	Sediment Pulp	43.02	7.57	3.23	3.02	20.3	1.25	1.54	0.36	0.15	0.09	0.015	263	46	339	233	21	11	8	19.3	99.96
C 024.01	REP	43.37	7.45	3.09	2.93	20.37	1.23	1.49	0.36	0.14	0.09	0.015	255	37	335	203	22	9	8	19.3	99.96
Reference Materials
STD SO-19	STD	60.53	13.9	7.48	2.91	5.95	4.07	1.27	0.7	0.33	0.13	0.492	464	457	319	119	36	72	27	1.9	99.89
STD SO-19	STD	60.22	14.04	7.62	2.96	5.96	4	1.29	0.7	0.33	0.13	0.496	468	464	317	119	36	78	28	1.9	99.89
STD SO-19	STD	60.34	14.06	7.52	2.92	5.97	4.03	1.28	0.7	0.33	0.13	0.497	460	465	315	117	34	74	28	1.9	99.9
STD SO-19	STD	60.66	13.91	7.45	2.89	5.95	4	1.27	0.7	0.33	0.13	0.487	459	455	314	117	34	76	28	1.9	99.91
STD SO-19	STD	60.2	14.13	7.61	2.93	5.92	3.99	1.29	0.7	0.34	0.13	0.508	479	477	319	118	36	78	29	1.9	99.88
STD SO-19	STD	60.58	13.87	7.46	2.91	5.87	4.08	1.31	0.7	0.34	0.13	0.499	476	464	314	114	35	74	28	1.9	99.88
BLK	BLK	0.02	<0.01	<0.04	<0.01	<0.01	<0.01	<0.01	<0.01	<0.01	<0.01	<0.002	<5	<20	<2	<5	<3	<5	<1	0	0.01
BLK	BLK	0.02	<0.01	<0.04	<0.01	<0.01	<0.01	<0.01	<0.01	<0.01	<0.01	<0.002	<5	<20	<2	<5	<3	<5	<1	0	0.05
BLK	BLK	0.02	<0.01	<0.04	<0.01	<0.01	<0.01	<0.01	<0.01	<0.01	<0.01	<0.002	<5	<20	<2	<5	<3	<5	<1	0	0.03
