# Supplementary material for: Two glaciers and one sedimentary sink: the competing role of the Aare and the Valais glaciers in filling an overdeepened trough inferred from provenance analysis
Source: Copernicus journal article supplement (doi:10.5194/egqsj-71-163-2022), 2022-09-01
Supplement: Supplementary file 1 [file egqsj-71-163-2022-supplement.zip › Supplement/Supplementary_Stutenbeckeretal2018.xlsx]

## Sheet: Overview and locations
River	Sample location			Used for fingerprinting
	Long	Lat
Aegene	8.31724	46.5035
Avancon	7.03006	46.2576		X
Baltschiederbach	7.8712	46.3109		X
Bietschbach	7.80358	46.3147
Blinne	8.24646	46.4674
Borgne	7.40729	46.2243		X
Dala	7.62259	46.3168		X
Drance	7.07118	46.105
Farne	7.22778	46.1754
Gamsa	7.94922	46.2997
Goneri	8.35716	46.533		X
Illbach	7.63306	46.3107
Lixerne	7.25699	46.2168		X
Lonza	7.74408	46.3194		X
Massa	7.9973	46.3606		X
Morge	7.31328	46.2271		X
Mundbach	7.95226	46.3092
Münstigerbach	8.26308	46.4866		X
Navisence	7.54353	46.2799		X
Printse	7.31854	46.2048		X
Sionne	7.36389	46.2473		X
Trient	7.04584	46.1322
Turtmanna	7.70129	46.298		X
Vispa	7.87031	46.2361		X
Wysswasser	8.13357	46.3979		X
Rhone-1	8.34585	46.5325		X
Rhone-2	8.21943	46.453
Rhone-3	8.12773	46.3927
Rhone-4	8.08483	46.372
Rhone-5	8.01477	46.3306
Rhone-6	7.98683	46.3208		X
Rhone-7	7.94133	46.3046
Rhone-8	7.79916	46.3087
Rhone-9	7.63532	46.3119
Rhone-10	7.52809	46.2799
Rhone-11	7.52191	46.2792		X
Rhone-12	7.31402	46.2106		X
Rhone-13	7.00745	46.2163		X
Rhone-14	6.93447	46.3202		X

## Sheet: Petrography
River	Sample name	Grain size (μm)	Q	Qp	Fsp	Lc	Lsm	Lmf	Lmb
Avancon	LS2014-41	63-250	3.8	0.4	4.6	80.8	10.5	0	0
Baltschiederbach	LS2014-4	63-250	38.8	15.1	26.5	0.4	2.9	16.3	0
Borgne	LS2014-19	63-250	24.2	18.9	17.2	9.4	18.4	11.1	0.8
Dala	LS2014-34	63-250	6.4	3.6	0.4	41.3	38.2	0	0
Goneri	LS2014-29	63-250	47.1	8	29.2	0	5.6	10.1	0
Lixerne	LS2014-24	63-250	4.4	0.8	0.4	66.8	27.6	0	0
Lonza	LS2014-1	63-250	28.5	10	17.5	0	12.8	31.2	0
Massa	LS2014-45	63-250	57	1	30	0	0	12	0
Morge	LS2014-21	63-250	10	0	0	75	15	0	0
Münstigerbach	LS2014-27	63-250	46.7	10.2	29.7	0.4	6.9	6.1	0
Navisence	LS2014-15	63-250	34.1	11	9.9	9.9	17.6	13.2	4.4
Printse	LS2014-23	63-250	22.3	14.9	14	3.7	33.9	10.7	0.4
Rhône-13	LS2014-40	63-250	41.7	6.3	16.7	13.5	12.5	9.4	0
Rhône-12	LS2014-22	63-250	39.6	4.2	28.1	10.4	7.3	9.4	1
Rhône-11	LS2014-16	63-250	41	10	17	14	12	6	0
Rhône-1	LS2014-30	63-250	64	1.1	22.5	1.1	4.5	6.7	0
Rhône-6	LS2014-11	63-250	65.6	0	21.1	6.7	3.3	3.3	0
Rhône-14	LS2014-44	63-250	38	4.5	14	18	16.4	8	1.1
Sionne	LS2014-20	63-250	4.8	0.8	1.2	72.4	20.8	0	0
Turtmanna	LS2014-12	63-250	14.9	22.4	14.1	7.9	23.7	16.2	0.8
Vispa	LS2014-5	63-250	26.4	16.9	12.6	7.8	21.2	9.5	5.6
Wysswasser	LS2014-25	63-250	36.3	11.5	33.5	0.4	6.5	11.8	0
all units in %
mass conservation test		max source	57	22.4	33.5	80.8	38.2	31.2	5.6
		max in-stream	41.7	6.3	16.7	18	16.4	9.4	1.1
		min source	3.8	0	0	0	0	0	0
		min in-stream	38	4.5	14	13.5	12.5	8	0
		max	15.3	16.1	16.8	62.8	21.8	21.8	4.5
		min	34.2	4.5	14	13.5	12.5	8	0

## Sheet: Heavy minerals
River	Sample name	Grain size (μm)	HMC1	HMC descriptive2	Garnet	Amphibole	Kyanite	Apatite	Monazite	FeOx3	Epidote	Sphene	Olivine	Pyroxene	Tourmaline	Wollastonite	Zircon	TiO2	Sulfide traps4	Others5	Spurious grains6
Avancon	LS2014-41	63-250	5.47726	rich	0.05	0.88	0	1.08	0	17.66	0.47	0.04	0	0.07	0	0.01	0.32	0.05	9.65	0.9	68.82
Baltschiederbach	LS2014-4	63-250	2.45091	moderately rich	0.74	14.79	0	3.53	0.1	9.33	27.02	10.9	0	0	0	0	0.51	0.18	2.19	3.28	27.43
Borgne	LS2014-19	63-250	11.8717	very rich	0.29	13.82	0	1.65	0	12.21	35.7	5.23	0.31	2.33	0.08	0	0.09	1.14	0.75	2.05	24.35
Dala	LS2014-34	63-250	1.0567	moderately poor	0.05	2.71	0	8.28	0.11	46.66	3.02	0.25	0	0.03	0.15	0.01	0.32	0.93	8.32	0.72	28.44
Lixerne	LS2014-24	63-250	0.150868	very poor	0.09	1.43	0	3.6	0	40.94	1.27	0	0.01	0.03	0.07	0.23	0	0.48	17.86	3.16	30.83
Lonza	LS2014-1	63-250	3.50787	moderately rich	0.21	39.22	0	3.1	0.06	3.76	11.09	3.6	0	0.98	0.13	0	0.04	0.27	0.17	1.08	36.29
Massa	LS2014-45	63-250	7.1462	rich	1.06	21.56	0	3.12	0.21	5.75	22	4.56	0	0.11	0.02	0	0.23	0.3	18.13	0.94	22.01
Morge	LS2014-21	63-250	0.0173704	very poor	0.22	3.67	0.11	2.62	0	33.66	2.09	0.25	0	0.32	0.09	0.66	0	0.17	11.63	0.83	43.68
Münstigerbach	LS2014-27	63-250	4.65167	moderately rich	1.94	4.83	0	2.34	0.22	16.52	42.8	8.2	0	0.05	0	0	0.59	0.11	1.2	1.04	20.16
Navisence	LS2014-15	63-250	6.49378	rich	0.28	22.49	0	0.63	0	3.88	34.44	4.44	0	0.62	0.06	0	0.02	0.21	0.46	0.33	32.14
Printse	LS2014-23	63-250	16.1678	very rich	0.19	6.36	0	6.01	0	12.48	12.1	2.8	0	0.15	0.39	0	0.11	2.27	0.3	1.68	55.16
Rhône-13	LS2014-40	63-250	4.85335	moderately rich	0.68	21.9	0.18	2.16	0	8.44	30.55	3.14	0.45	1.23	0.06	0	0.02	0.68	0.09	0.94	29.48
Rhône-14	LS2014-44	63-250	4.84623	moderately rich	0.56	18.41	0.05	3.73	0.02	12.24	30.54	4.86	0.47	1.25	0.32	0	0.35	0.51	0.4	1.02	25.27
Sionne	LS2014-20	63-250	0.37614	very poor	0.17	2.96	0	4.57	0	36.42	1.06	0.19	0	0.04	0.02	0.21	0.07	0.15	30.87	0.75	22.52
Turtmanna	LS2014-12	63-250	16.2245	very rich	1.32	19.01	0	1.92	0	13.19	33.87	4.68	0	0.43	0.14	0	0.02	0.38	0.45	0.71	23.88
Vispa	LS2014-5	63-250	25.9934	extremely rich	1.09	23.53	0.25	1.73	0.05	24.42	24.22	1.93	0.49	1.54	0.13	0	0.01	0.12	0.26	0.9	19.33
Wysswasser	LS2014-25	63-250	5.1369	rich	1.48	14.48	0	2.23	0.24	5.81	38.65	8.22	0	0.16	0.01	0	0.11	0.07	3.27	0.77	24.5
mass conservation test				max source	1.94	39.22	0.25	8.28	0.24	46.66	42.8	10.9	0.49	2.33	0.39	0.66	0.59	2.27	30.87
				max in-stream	0.68	21.9	0.18	3.73	0.02	12.24	30.55	4.86	0.47	1.25	0.32	0	0.35	0.68	0.4
				min source	0.05	0.88	0	0.63	0	3.76	0.47	0	0	0	0	0	0	0.05	0.17
				min in-stream	0.56	18.41	0.05	2.16	0	8.44	30.54	3.14	0.45	1.23	0.06	0	0.02	0.51	0.09
				max	1.26	17.32	0.07	4.55	0.22	34.42	12.25	6.04	0.02	1.08	0.07	0.66	0.24	1.59	30.47
				min	0.51	17.53	0.05	1.53	0	4.68	30.07	3.14	0.45	1.23	0.06	0	0.02	0.46	-0.08
all units in area%
1heavy mineral concentration, calculated following Garzanti & Andò (2007)
2 following Garzanti et al. 2012
3include limonite, goethite, hematite, illmenite
4mostly pyrite
5include barite, fluorite, Cu traps, Cr traps, Ti traps
6phyllosilicates, carbonates, evaporites, clay minerals, intergrown phases (mostly quartz and feldspars)
		63-250
		63-250
		63-250

## Sheet: Geochemistry
River	Sample name	Grain size (μm)	SiO2	Al2O3	Fe2O3	MgO	CaO	Na2O	K2O	TiO2	P2O5	MnO	Cr2O3	Ba	Ni	Sr	Zr	Y	Nb	Sc	LOI	Sum
Avancon	LS2014-41	<63	30.83	6.15	2.54	3.63	27.53	0.45	1.13	0.34	0.09	0.04	0.008	210	36	663	146	13	8	6	27.1	99.92
Baltschiederbach	LS2014-4	<63	74.93	11.1	2.14	1.01	1.92	2.85	3.23	0.38	0.17	0.05	0.003	546	<20	175	799	57	40	6	2	99.97
Borgne	LS2014-19	<63	62.91	8.8	8.62	1.82	6.82	1.94	1.33	1.46	0.33	0.08	0.016	884	28	275	3095	71	22	13	5.2	99.93
Dala	LS2014-34	<63	44.15	7.43	3.4	1.45	21	0.27	1.46	0.5	0.14	0.04	0.01	150	33	526	359	20	11	7	20	99.96
Goneri	LS2014-29	<63	65.75	15.08	4.28	1.65	1.74	3.06	3.52	0.63	0.23	0.07	0.009	492	26	191	522	87	33	13	3.7	99.93
Lixerne	LS2014-24	<63	34.5	7.95	3.23	1.94	25.88	0.35	1.38	0.47	0.08	0.03	0.011	134	32	781	252	16	9	8	23.9	99.93
Lonza	LS2014-1	<63	67.79	12.88	4.83	2.11	2.75	2.86	2.46	0.86	0.37	0.09	0.01	690	30	259	650	43	18	15	2.7	99.92
Massa	LS2014-45	<63	72.77	11.98	3.65	1.3	2.11	2.98	2.8	0.53	0.22	0.07	0.005	480	22	221	492	42	17	11	1.4	99.94
Morge	LS2014-21	<63	36.02	7.09	3.09	1.72	25.85	0.32	1.19	0.42	0.09	0.03	0.008	113	27	738	259	14	<5	7	23.9	99.91
Münstigerbach	LS2014-27	<63	68.17	13.22	3.65	1.82	2.51	2.93	3.37	0.44	0.17	0.1	0.01	607	38	276	409	42	23	8	3.4	99.93
Navisence	LS2014-15	<63	55.99	15.08	5.47	3.04	7.04	2.65	2.6	0.74	0.18	0.11	0.013	460	58	293	291	32	10	17	6.9	99.91
Printse	LS2014-23	<63	60.68	12.12	8.22	1.83	4.49	2.4	1.87	1.42	0.41	0.11	0.012	776	36	217	693	67	22	12	6.2	99.93
Rhone-13	LS2014-40	<63	51.78	12.86	4.9	2.85	10.77	1.52	2.66	0.65	0.17	0.09	0.017	452	75	325	257	31	14	12	11.5	99.91
Rhone-12	LS2014-22	<63	54.69	11.74	5.27	3.57	8.73	1.85	2.45	0.77	0.26	0.14	0.021	576	91	328	939	50	18	13	10.1	99.88
Rhone-11	LS2014-16	<63	60.97	11.84	4.84	2.82	7.76	2.36	2.04	0.84	0.29	0.1	0.014	572	51	326	651	46	14	16	5.8	99.92
Rhone-1	LS2014-30	<63	67.97	12.99	4.09	1.9	2.71	3.07	2.87	0.65	0.47	0.07	0.004	838	<20	388	443	52	28	12	2.9	99.93
Rhone-6	LS2014-11	<63	67.68	11.53	3.12	1.63	5.49	2.65	2.42	0.6	0.34	0.07	0.004	474	24	349	694	55	19	13	4.2	99.94
Rhone-14	LS2014-44	<63	56.03	9.93	3.62	2.56	11.36	1.5	2.09	0.54	0.19	0.06	0.009	405	40	347	349	28	11	10	11.9	99.92
Sionne	LS2014-20	<63	38.76	8.77	3.54	1.74	22.95	0.54	1.51	0.5	0.09	0.04	0.011	165	44	735	245	17	13	8	21.3	99.95
Turtmanna	LS2014-12	<63	55.31	14.62	7.02	3.29	7.05	2.66	2.09	1.09	0.24	0.13	0.017	377	47	262	353	37	13	21	6.3	99.9
Vispa	LS2014-5	<63	54.56	13.08	7.95	6.85	7.59	2.13	1.36	1.39	0.27	0.14	0.071	219	297	226	329	40	12	22	4.3	99.85
Wysswasser	LS2014-25	<63	66.58	12.51	4.35	1.78	4.07	2.74	2.6	0.56	0.25	0.09	0.012	589	50	312	632	41	19	11	4.2	99.93
unit			%	%	%	%	%	%	%	%	%	%	%	PPM	PPM	PPM	PPM	PPM	PPM	PPM	%	%
detection limits			0.01	0.01	0.04	0.01	0.01	0.01	0.01	0.01	0.01	0.01	0.002	5	20	2	5	3	5	1	-5.1	0.01
mass comversation test		max source	74.93	15.08	8.62	6.85	27.53	3.06	3.52	1.46	0.41	0.14	0.071	884	297	781	3095	87	40	22	27.1
		max in-stream	56.03	12.86	4.9	2.85	11.36	1.52	2.66	0.65	0.19	0.09	0.017	452	75	347	349	31	14	12	11.9
		min source	30.83	6.15	2.14	1.01	1.74	0.27	1.13	0.34	0.08	0.03	0.003	113	22	175	146	13	8	6	1.4
		min in-stream	51.78	9.93	3.62	2.56	10.77	1.5	2.09	0.54	0.17	0.06	0.009	405	40	325	257	28	11	10	11.5
		max	18.9	2.22	3.72	4	16.17	1.54	0.86	0.81	0.22	0.05	0.054	432	222	434	2746	56	26	10	15.2
		min	20.95	3.78	1.48	1.55	9.03	1.23	0.96	0.2	0.09	0.03	0.006	292	18	150	111	15	3	4	10.1
